# Supplementary material for: Macrophage-specific deletion of Notch-1 induced M2 anti-inflammatory effect in atherosclerosis via activation of the PI3K-oxidative stress axis
Source: Aging (Albany NY). 2023 Dec 26;15(24):15196–212. doi: 10.18632/aging.205342 (PMC10781475; doi:10.18632/aging.205342)
Supplement: Supplementary Table 1 [file aging-15-205342-s001.xlsx]

## Sheet: Supplementary Table 1
Supplementary Table 1. GSE155842 is a bone marrow-derived macrophage (BMDM) RNA-seq dataset from a Mus musculus cell line.
EnsemblGene_GeneSymbol	mean_logCPM	log2FC	pvalue	padj	gCT.7	gCT.6	gCT.5	gCT.2	gGM.15	gGM.13	gGM.11	gGM.9
ENSMUSG00000022126	4.37132	-5.07343	3.72372e-97	4.70642e-93	45.191	54.017	34.087	29.751	0.907	2.055	0.679	1.225
ENSMUSG00000018986	5.43857	-2.23544	1.33533e-82	8.43863e-79	71.155	80.62	68.687	67.093	13.258	18.13	17.523	12.065
ENSMUSG00000070034	6.56737	-2.12031	4.70181e-80	1.98087e-76	166.027	186.329	144.664	121.209	35.542	39.045	34.407	33.178
ENSMUSG00000041797	4.86106	1.98081	6.0133e-77	1.90005e-73	9.907	11.679	13.347	11.541	44.525	43.977	41.353	53.631
ENSMUSG00000016496	7.92382	-1.87963	2.14533e-74	5.42296e-71	422.975	436.138	341.127	328.541	112.932	109.784	102.384	90.297
ENSMUSG00000079339	6.51971	-6.76543	1.75573e-69	3.69845e-66	243.966	268.572	123.668	94.228	0.605	2.329	1.836	1.932
ENSMUSG00000066677	4.87247	-4.33594	5.86504e-66	1.05898e-62	67.836	72.618	46.613	38.471	1.9	4.612	2.754	1.885
ENSMUSG00000034855	3.98513	-4.65569	7.597e-57	1.20023e-53	36.065	43.095	26.797	17.902	0.864	2.192	0.958	0.895
ENSMUSG00000060519	7.65352	-1.88954	1.81266e-56	2.54557e-53	336.106	364.818	309.555	259.191	78.426	105.4	87.416	71.399
ENSMUSG00000029798	6.24877	-1.81906	4.54593e-56	5.7456e-53	123.179	134.367	117.097	100.486	29.928	40.187	37.042	27.428
ENSMUSG00000023341	4.15879	-2.64359	7.49473e-56	8.61145e-53	33.284	36.282	27.567	27.34	5.01	6.576	5.309	2.969
ENSMUSG00000028268	6.54667	-2.63133	1.72202e-55	1.81372e-52	187.501	196.765	141.636	119.824	21.55	34.89	26.783	20.972
ENSMUSG00000023961	3.38118	-2.46518	4.18154e-55	4.06542e-52	20.058	20.709	16.992	13.696	2.98	3.79	3.273	2.875
ENSMUSG00000013236	5.62214	1.24528	2.62977e-54	2.37412e-51	26.451	30.767	31.623	27.443	72.293	66.994	64.783	71.54
ENSMUSG00000039236	4.06781	-3.65004	4.17644e-53	3.51907e-50	41.482	40.932	23.769	19.748	2.03	2.512	3.273	2.168
ENSMUSG00000018930	5.25963	-1.43451	5.89783e-53	4.65891e-50	54.757	56.883	55.237	57.501	17.749	22.514	23.989	18.663
ENSMUSG00000104713	4.63895	-3.65435	4.60015e-52	3.42007e-49	53.976	56.504	41.274	34.829	2.505	5.845	4.311	2.121
ENSMUSG00000020641	9.05996	-3.35432	1.98863e-51	1.39635e-48	1062.73	1098.51	951.202	779.42	72.293	141.933	109.768	56.506
ENSMUSG00000034438	3.97433	-2.66925	2.66301e-51	1.77146e-48	31.429	35.849	23.717	18.928	4.448	4.612	4.191	4.006
ENSMUSG00000046718	8.98443	-1.99665	9.5084e-51	6.00884e-48	872.01	895.473	767.163	706.838	186.262	251.488	224.287	150.149
ENSMUSG00000040430	6.49634	1.25445	3.5198e-50	2.02213e-47	50.072	51.205	61.09	50.269	138.714	115.857	119.867	132.9
ENSMUSG00000091649	6.65703	-2.88726	3.50886e-50	2.02213e-47	201.751	225.207	163.043	123.209	19.65	32.287	27.262	17.155
ENSMUSG00000020638	7.3426	-2.8843	1.44393e-49	7.93472e-47	306.336	338.432	281.783	219.079	29.971	53.978	45.664	25.496
ENSMUSG00000076441	4.53055	-2.12257	3.15638e-48	1.66223e-45	37.432	48.34	35.781	29.956	8.896	10.64	8.023	7.211
ENSMUSG00000024675	7.40688	-5.4311	4.39064e-48	2.21973e-45	457.234	476.529	211.555	184.558	4.535	13.243	7.983	5.043
ENSMUSG00000067212	9.01659	-1.81755	7.99175e-48	3.88491e-45	885.041	914.398	758.744	670.676	205.35	280.167	243.327	187.145
ENSMUSG00000038179	7.82757	-1.19293	1.45916e-47	6.8305e-45	318.585	359.303	304.524	282.479	127.313	147.55	141.062	137.33
ENSMUSG00000085295	6.42042	-1.53682	1.92103e-47	8.67139e-45	140.748	135.827	113.247	120.593	42.02	49.686	49.376	34.733
ENSMUSG00000000682	7.41469	-1.47266	3.89256e-47	1.5888e-44	268.953	287.442	239.995	207.897	85.94	105.308	88.693	81.908
ENSMUSG00000047798	6.29938	-1.74196	3.8969e-47	1.5888e-44	135.623	136.151	102.466	111.822	46.08	34.296	34.527	30.35
ENSMUSG00000075602	5.6779	-4.08405	3.80606e-47	1.5888e-44	124.447	128.96	71.87	63.862	4.491	8.448	6.945	3.016
ENSMUSG00000027514	7.05109	-3.2016	6.3184e-47	2.49557e-44	264.316	283.225	217.972	193.585	20.902	38.771	30.017	14.515
ENSMUSG00000001281	4.27478	-1.6625	4.83106e-46	1.8503e-43	32.649	30.821	25.668	29.187	9.155	9.818	10.817	7.493
ENSMUSG00000075010	5.69511	-3.66232	7.53793e-46	2.80211e-43	129.572	136.151	69.714	50.935	6.996	9.681	7.225	6.598
ENSMUSG00000105504	5.18828	-3.04146	1.4165e-45	5.11519e-43	74.327	89.542	58.369	39.753	6.91	11.143	7.025	6.739
ENSMUSG00000021880	3.65998	-2.2955	1.62606e-45	5.70883e-43	22.791	26.549	19.816	15.799	3.628	5.115	4.311	4.242
ENSMUSG00000022014	6.54322	-1.44898	2.27063e-45	7.75635e-43	145.628	152.481	132.19	116.541	46.598	60.966	45.783	46.986
ENSMUSG00000078921	4.57147	-3.63416	2.44795e-45	8.142e-43	52.707	56.991	38.194	30.059	2.548	5.845	3.792	2.121
ENSMUSG00000050578	5.64383	-1.6083	5.5777e-45	1.8076e-42	90.285	75.321	69.817	66.529	21.679	27.126	28.859	21.302
ENSMUSG00000043953	4.65351	-1.49153	2.0143e-44	6.36469e-42	34.992	41.256	37.835	35.085	12.783	16.303	12.094	11.876
ENSMUSG00000026390	5.36526	1.58396	4.48678e-44	1.38313e-41	21.424	16.978	21.715	21.698	61.627	75.305	54.046	54.527
ENSMUSG00000028270	6.88184	-2.70853	5.9658e-44	1.79528e-41	223.859	262.678	198.464	135.212	26.214	44.754	30.416	24.082
ENSMUSG00000033538	5.62544	-1.58507	1.13198e-43	3.32724e-41	79.109	86.298	74.488	57.142	24.962	28.131	23.79	22.103
ENSMUSG00000047735	7.84849	-1.55781	1.41032e-43	4.05115e-41	343.28	393.26	320.336	320.437	102.956	140.335	129.167	95.292
ENSMUSG00000026088	4.15686	-1.36495	1.61332e-43	4.53129e-41	26.988	27.847	25.514	22.877	10.321	10.184	10.019	9.52
ENSMUSG00000030149	3.33103	-4.02396	3.46419e-43	9.51825e-41	23.816	25.143	15.401	12.926	0.734	1.69	1.756	0.518
ENSMUSG00000092021	1.2553	-6.59832	3.73342e-43	1.00397e-40	5.564	7.191	3.285	3.283	0	0.091	0	0.094
ENSMUSG00000068245	6.30529	-2.78878	4.40415e-43	1.15967e-40	152.314	174.163	126.184	101.922	17.749	27.903	22.393	12.159
ENSMUSG00000035352	3.26436	-3.04906	5.12026e-43	1.32071e-40	19.472	23.845	12.68	13.747	2.375	2.329	2.395	1.272
ENSMUSG00000059089	7.41117	-1.49058	3.59268e-42	9.08158e-40	277.396	292.471	236.402	198.869	89.222	102.249	81.508	84.736
ENSMUSG00000000204	4.15056	-4.38441	5.25582e-42	1.30252e-39	54.22	43.798	18.738	20.62	1.555	1.827	2.116	1.037
ENSMUSG00000029298	6.54389	-1.61238	7.31905e-42	1.77895e-39	144.115	163.511	140.455	115.361	42.927	54.572	50.134	36.571
ENSMUSG00000037321	7.62626	-1.7566	7.61238e-42	1.81534e-39	325.906	345.623	288.559	260.679	80.888	110.423	101.466	68.43
ENSMUSG00000002307	6.27665	-1.33094	1.01711e-41	2.38061e-39	119.665	122.958	111.758	90.073	41.286	49.549	45.743	40.059
ENSMUSG00000062488	6.48299	-3.41649	2.5934e-41	5.95963e-39	196.236	189.411	143.74	127.108	12.438	23.199	18.401	7.399
ENSMUSG00000031897	6.89315	-1.32343	3.11279e-41	7.02545e-39	182.181	192.115	169.511	136.289	66.118	75.853	67.737	62.02
ENSMUSG00000021871	8.1294	-1.4096	3.51653e-41	7.79745e-39	413.849	452.089	419.517	342.904	140.355	181.298	159.424	131.817
ENSMUSG00000025492	9.16408	-2.38354	9.91539e-41	2.1607e-38	1026.03	1115.11	910.801	801.066	154.477	250.255	213.47	120.129
ENSMUSG00000056116	7.24182	-1.64048	1.38995e-40	2.97755e-38	250.993	278.304	209.399	179.12	64.952	86.585	74.922	67.911
ENSMUSG00000029780	5.89284	-1.58878	2.30247e-40	4.85015e-38	96.142	100.681	91.275	69.504	28.632	34.342	31.813	24.035
ENSMUSG00000027399	3.30167	-1.67676	2.35077e-40	4.87072e-38	16.203	15.032	14.117	15.132	5.398	5.16	3.992	4.383
ENSMUSG00000021838	4.17361	1.58541	2.74503e-40	5.50705e-38	7.955	8.651	9.189	9.746	23.752	25.254	25.267	32.471
ENSMUSG00000042286	10.0425	1.42075	2.73952e-40	5.50705e-38	518.14	524.707	631.79	619.073	1643.66	1301.28	1424.04	1771.91
ENSMUSG00000035208	7.22263	-1.88816	3.31378e-40	6.54419e-38	263.926	278.413	215.765	183.839	54.717	80.42	68.017	51.275
ENSMUSG00000048621	4.8541	-1.15576	3.48087e-40	6.76841e-38	39.97	41.31	42.711	36.111	18.268	17.627	19.639	16.212
ENSMUSG00000015947	8.96155	-2.09585	4.0083e-40	7.67589e-38	890.067	991.99	756.023	595.58	167.605	247.561	190.638	150.62
ENSMUSG00000078616	4.16163	-1.99252	5.9762e-40	1.12736e-37	32.21	31.686	27.465	23.903	6.003	9.955	7.065	5.938
ENSMUSG00000000386	7.31831	-3.29434	9.60232e-40	1.78476e-37	346.549	385.798	239.79	188.866	25.868	44.936	29.977	17.532
ENSMUSG00000054203	6.02257	-4.61866	1.03923e-39	1.9036e-37	162.27	159.672	91.635	88.739	3.153	7.672	7.544	2.026
ENSMUSG00000031639	5.51582	-1.51946	1.12413e-39	2.01901e-37	71.594	82.296	60.114	58.168	21.723	26.35	26.105	20.689
ENSMUSG00000031714	4.8119	1.4452	1.14391e-39	2.01901e-37	14.202	16.275	17.095	12.208	41.286	39.913	35.445	46.185
ENSMUSG00000044703	4.08315	-3.53262	1.15016e-39	2.01901e-37	36.651	41.31	27.413	21.133	2.159	4.384	3.034	1.32
ENSMUSG00000067297	1.51646	-3.52108	1.3717e-39	2.37492e-37	6.003	6.813	4.21	4.36	0.389	0.457	0.479	0.518
ENSMUSG00000052749	3.90013	-3.4525	2.09935e-39	3.58563e-37	36.505	34.714	21.356	18.363	2.764	3.151	3.034	1.131
ENSMUSG00000026536	7.76672	-2.50227	4.44737e-39	7.49472e-37	406.626	417.213	350.419	308.331	52.989	90.695	77.876	40.059
ENSMUSG00000040296	7.4689	-1.74818	4.83755e-39	8.04498e-37	278.079	311.991	275.006	228.209	72.553	99.874	92.525	60.418
ENSMUSG00000072620	9.1386	-1.41249	7.40929e-39	1.21618e-36	809.347	915.75	852.997	700.478	292.283	370.542	309.707	259.062
ENSMUSG00000040152	9.44623	1.4202	1.13919e-38	1.84593e-36	425.61	410.13	381.631	299.97	1154.06	1009.93	892.317	1004.53
ENSMUSG00000027078	7.28877	-1.85084	1.1545e-38	1.84705e-36	258.948	276.412	236.145	209.076	61.54	86.813	75.64	47.788
ENSMUSG00000001123	8.63283	-1.32663	1.32392e-38	2.09163e-36	588.514	617.277	547.908	517.459	217.312	264.093	240.373	183.657
ENSMUSG00000079197	7.29455	-1.12865	2.41925e-38	3.77493e-36	223.322	234.885	212.787	191.328	92.893	111.199	102.943	87.281
ENSMUSG00000068246	1.88017	-4.3425	2.72878e-38	4.20598e-36	9.517	9.192	5.082	4.873	0.561	0.137	0.479	0.189
ENSMUSG00000022587	10.2235	-2.23546	2.89733e-38	4.41197e-36	2135.32	2281.32	1882.23	1592.18	374.078	563.805	459.191	278.573
ENSMUSG00000008845	4.04418	2.13011	6.65609e-38	1.0015e-35	5.076	5.407	6.725	6.873	31.008	20.87	21.036	32.612
ENSMUSG00000071547	6.29043	1.09948	7.67071e-38	1.14059e-35	44.85	43.527	58.215	51.961	108.786	105.993	102.504	108.253
ENSMUSG00000020415	4.98271	-1.22471	9.69886e-38	1.42539e-35	46.509	49.097	42.198	39.805	17.793	21.555	19.639	16.966
ENSMUSG00000040229	4.05433	1.44512	1.33108e-37	1.93374e-35	7.808	9.3	9.24	8.823	22.716	24.752	21.115	27.24
ENSMUSG00000039501	9.04533	-1.72015	1.93023e-37	2.77229e-35	860.981	920.832	785.439	676.42	217.183	301.54	277.774	187.946
ENSMUSG00000026271	4.43453	-1.95212	2.39085e-37	3.39527e-35	40.409	42.338	30.802	24.827	9.415	10.047	8.502	7.776
ENSMUSG00000035692	7.12122	-3.44393	2.65366e-37	3.72663e-35	278.713	310.963	241.279	191.431	18.009	37.127	27.741	11.028
ENSMUSG00000038507	7.23647	-1.3625	3.73598e-37	5.1889e-35	218.051	246.511	216.74	188.046	78.944	98.23	92.405	68.43
ENSMUSG00000070501	1.52685	-4.44847	5.91944e-37	8.13215e-35	7.564	6.813	3.44	4.617	0.345	0.365	0.239	0.047
ENSMUSG00000041827	5.77883	-3.54649	6.91036e-37	9.3914e-35	120.982	124.147	84.602	77.044	7.601	12.695	10.977	3.487
ENSMUSG00000082292	4.875	-2.21135	9.59962e-37	1.29074e-34	48.022	58.235	48.718	39.343	9.587	14.202	11.655	6.457
ENSMUSG00000035373	5.75411	-2.99112	1.82767e-36	2.43157e-34	138.259	96.571	50.514	99.819	12.869	13.152	14.45	7.917
ENSMUSG00000024732	5.37959	-1.19526	1.91768e-36	2.51315e-34	60.613	61.912	54.827	54.936	27.078	27.492	26.464	20.312
ENSMUSG00000062960	3.43996	-1.54037	1.92876e-36	2.51315e-34	14.494	18.6	15.298	16.671	5.83	5.297	5.548	5.655
ENSMUSG00000073902	5.90926	-2.59852	2.04946e-36	2.64318e-34	117.957	127.5	87.887	80.994	10.581	24.249	19.838	13.714
ENSMUSG00000037816	5.16176	-1.13247	3.7323e-36	4.7649e-34	52.366	52.016	47.794	44.883	21.075	24.341	24.548	19.841
ENSMUSG00000036067	4.45364	-1.53364	4.88786e-36	6.17776e-34	28.013	38.066	36.654	28.263	10.451	10.914	13.092	10.698
ENSMUSG00000017493	7.08221	1.8714	6.27145e-36	7.848e-34	41.678	50.773	72.846	66.785	235.062	183.764	181.018	249.353
ENSMUSG00000030921	8.14157	-1.441	7.30097e-36	9.04676e-34	436.151	459.281	401.806	354.65	143.853	183.079	162.178	119.233
ENSMUSG00000064215	5.21399	1.77521	7.94769e-36	9.7525e-34	13.323	14.221	18.122	20.877	65.859	45.576	51.731	64.659
ENSMUSG00000027580	6.68853	-2.0727	1.20895e-35	1.46922e-33	168.907	197.36	162.991	138.803	33.296	51.375	47.859	26.203
ENSMUSG00000030156	2.43404	-2.79878	2.3565e-35	2.83655e-33	11.273	11.788	7.187	8.156	0.907	1.964	1.237	1.414
ENSMUSG00000010095	9.77836	-1.17295	2.87429e-35	3.40873e-33	1397.37	1299.06	1077.85	1093.14	575.066	522.659	556.147	504.833
ENSMUSG00000052485	3.9961	-1.92796	2.88579e-35	3.40873e-33	30.111	30.334	20.483	20.928	5.485	7.809	7.185	6.268
ENSMUSG00000071068	4.22832	-2.99622	2.9245e-35	3.42247e-33	39.53	41.094	29.159	24.929	3.541	4.841	6.347	2.074
ENSMUSG00000040483	7.67879	-2.01789	3.54501e-35	4.11059e-33	362.898	367.36	307.296	278.375	69.745	109.555	91.048	54.527
ENSMUSG00000053318	3.17809	-3.20989	3.68417e-35	4.23311e-33	22.303	20.439	11.602	12.054	1.08	2.42	2.275	1.367
ENSMUSG00000029605	3.27092	-1.82611	5.09181e-35	5.74602e-33	17.52	15.356	15.606	12.208	4.448	5.023	4.271	3.346
ENSMUSG00000090272	7.56053	-1.66208	6.7634e-35	7.56483e-33	300.187	336.972	281.013	230.466	82.269	114.076	96.756	69.796
ENSMUSG00000045932	9.84604	-3.86046	6.8332e-35	7.57586e-33	1804.39	2132.08	1721.91	1232.91	75.144	206.598	135.554	57.119
ENSMUSG00000043263	7.95675	-2.83735	1.07826e-34	1.18506e-32	487.931	520.219	398.777	338.646	46.252	95.535	66.739	35.676
ENSMUSG00000030717	4.79053	-1.21805	1.35357e-34	1.47481e-32	42.215	41.905	38.81	32.316	17.274	17.947	16.405	15.081
ENSMUSG00000049401	7.13582	-1.02945	1.53462e-34	1.65778e-32	199.897	202.605	186.863	166.194	90.777	102.477	95.159	81.673
ENSMUSG00000106734	6.20373	-1.04509	1.7491e-34	1.87347e-32	99.997	111.387	94.201	92.022	48.152	53.887	48.218	42.368
ENSMUSG00000028037	6.69349	-4.0826	2.10494e-34	2.23566e-32	224.347	251.81	169.46	138.854	7.989	20.094	13.611	4.571
ENSMUSG00000027322	8.8889	-1.48303	2.8686e-34	3.02135e-32	709.985	794.252	652.787	637.078	206.516	298.389	287.354	207.221
ENSMUSG00000039899	6.87598	-3.02897	4.47937e-34	4.67891e-32	256.41	311.558	163.453	107.872	20.686	33.337	23.351	25.449
ENSMUSG00000078763	5.34653	-5.63412	4.67571e-34	4.84396e-32	107.903	104.574	56.829	52.372	0.389	2.877	2.515	0.66
ENSMUSG00000062007	0.878584	-4.83691	5.58135e-34	5.73517e-32	4.051	4.975	2.567	2.77	0.173	0.091	0.2	0
ENSMUSG00000053835	7.01607	-2.04778	5.74536e-34	5.8561e-32	213.366	239.806	208.629	173.375	44.827	70.921	53.447	32.754
ENSMUSG00000079492	5.41427	-1.22015	9.15739e-34	9.25922e-32	68.714	64.723	55.751	49.961	26.257	26.578	26.903	22.857
ENSMUSG00000025058	4.92253	-1.11363	1.81476e-33	1.82038e-31	43.63	46.826	39.631	36.214	19.261	20.642	18.92	18.003
ENSMUSG00000039997	7.45073	-1.50406	2.09546e-33	2.0854e-31	251.677	292.093	261.762	230.107	78.253	116.04	98.951	71.823
ENSMUSG00000058163	6.85564	-1.57556	2.66487e-33	2.63135e-31	172.128	199.469	173.464	149.626	46.555	73.707	65.302	47.458
ENSMUSG00000037921	6.33296	-1.58699	3.40833e-33	3.33937e-31	127.571	136.205	115.66	105.308	36.104	51.238	44.307	29.643
ENSMUSG00000079363	4.13886	-5.46531	3.5597e-33	3.46085e-31	49.633	52.828	20.534	16.978	0.389	1.781	0.519	0.471
ENSMUSG00000039031	7.47225	1.07459	7.2256e-33	6.97133e-31	107.269	121.985	127.878	99.563	245.988	234.683	214.468	266.743
ENSMUSG00000021591	6.24186	-1.18259	1.20477e-32	1.14489e-30	119.225	116.199	89.068	96.28	45.561	52.517	45.624	41.661
ENSMUSG00000078920	6.7583	-2.23883	2.42251e-32	2.26801e-30	190.136	211.689	183.68	130.647	30.921	54.983	40.195	25.59
ENSMUSG00000063286	7.81296	-1.45957	3.62903e-32	3.3726e-30	309.215	371.199	336.815	302.945	89.222	147.094	133.199	110.468
ENSMUSG00000034422	8.85987	-1.47503	3.94749e-32	3.64177e-30	696.661	778.517	673.321	585.937	205.479	311.541	259.892	206.703
ENSMUSG00000070327	9.33593	-1.80991	5.07248e-32	4.6123e-30	1057.7	1110.68	966.449	888.985	207.898	373.42	336.091	230.172
ENSMUSG00000051043	3.75857	2.3328	6.8263e-32	6.11898e-30	5.71	4.272	4.004	3.539	21.334	21.007	15.168	31.057
ENSMUSG00000074896	8.89896	-3.44321	8.5573e-32	7.6166e-30	978.156	1028.65	823.735	669.291	59.381	137.686	88.613	36.053
ENSMUSG00000073409	5.62331	-2.70918	9.04988e-32	7.9987e-30	124.252	101.87	58.831	58.63	12.481	17.947	12.853	9.237
ENSMUSG00000040264	3.17149	-3.11409	1.15e-31	1.00936e-29	22.157	22.223	11.756	9.541	2.289	1.644	1.477	2.168
ENSMUSG00000066861	5.62494	-2.13803	1.46694e-31	1.27867e-29	88.87	90.029	74.694	69.35	17.62	24.067	21.435	10.18
ENSMUSG00000070427	6.21175	-2.0275	1.60698e-31	1.39113e-29	145.677	148.317	98.873	84.533	26.646	38.132	29.298	22.998
ENSMUSG00000111118	3.633	-4.68263	1.88836e-31	1.62361e-29	32.064	32.875	16.735	15.594	0.216	1.872	1.158	0.518
ENSMUSG00000040033	8.09296	-1.52088	1.98266e-31	1.69316e-29	418.436	461.822	399.701	340.801	126.017	177.143	153.556	108.017
ENSMUSG00000078606	4.11918	-2.04926	2.28817e-31	1.94095e-29	29.038	33.254	27.619	22.98	4.794	8.54	8.742	5.137
ENSMUSG00000029009	6.86553	-1.10132	2.98331e-31	2.51373e-29	165.588	184.869	154.521	131.827	73.114	81.424	75.201	67.016
ENSMUSG00000029915	5.19766	-1.024	3.22148e-31	2.69644e-29	45.631	47.745	48.358	55.398	22.845	25.482	26.424	22.103
ENSMUSG00000035385	5.44325	-1.90783	4.02758e-31	3.34898e-29	78.817	63.858	46.51	86.585	19.175	19.591	20.996	13.667
ENSMUSG00000024308	9.39006	-1.27461	4.59998e-31	3.79995e-29	953.999	1106.03	958.338	780.189	378.353	444.843	415.124	331.686
ENSMUSG00000040253	6.70253	-1.54299	5.41509e-31	4.44424e-29	167.54	196.873	141.071	115.772	47.332	61.148	47.819	56.93
ENSMUSG00000026548	5.22404	-1.91278	6.14794e-31	5.01315e-29	76.669	70.401	44.508	45.652	15.115	18.404	16.725	12.725
ENSMUSG00000034459	7.13765	-3.07629	6.59705e-31	5.34488e-29	256.069	294.58	257.449	201.177	20.513	49.412	34.807	14.892
ENSMUSG00000072621	5.74711	-1.19431	8.01407e-31	6.45158e-29	78.329	86.352	65.145	69.709	29.107	36.762	35.924	29.031
ENSMUSG00000071350	4.53237	-1.26268	9.51518e-31	7.61155e-29	37.578	34.66	30.339	28.468	14.295	14.796	13.891	11.593
ENSMUSG00000003283	6.78811	-1.07785	1.51307e-30	1.20275e-28	164.222	165.35	138.093	132.699	69.357	80.009	74.004	60.983
ENSMUSG00000057596	6.32017	-1.6433	2.06083e-30	1.61782e-28	129.376	135.611	119.561	100.589	36.147	48.087	44.506	26.486
ENSMUSG00000028957	3.46744	1.68587	2.13424e-30	1.6651e-28	4.343	5.245	5.852	5.078	17.188	15.07	13.651	20.171
ENSMUSG00000039304	3.24697	-2.8097	3.08412e-30	2.37684e-28	18.35	20.601	15.76	12.772	1.943	4.156	2.235	1.272
ENSMUSG00000042726	8.20254	-1.05226	6.2309e-30	4.68764e-28	427.269	448.575	386.713	327.874	185.959	208.561	189.161	183.233
ENSMUSG00000042719	5.61877	-1.09931	9.74701e-30	7.28949e-28	72.716	72.023	61.552	62.118	28.373	34.798	34.926	27.098
ENSMUSG00000026365	4.81545	1.88519	1.41841e-29	1.05455e-27	7.808	14.545	14.99	10.156	46.339	38.452	37.84	52.736
ENSMUSG00000032661	8.6147	-2.78018	1.95756e-29	1.44688e-27	723.454	779.544	646.883	589.579	81.103	146.637	124.577	46.421
ENSMUSG00000024338	7.31525	-1.07405	2.64449e-29	1.94324e-27	228.983	234.29	209.604	191.38	98.982	118.917	106.775	85.773
ENSMUSG00000096727	6.11876	-1.17639	3.60832e-29	2.63616e-27	100.144	110.846	95.998	78.942	40.033	50.645	41.193	38.88
ENSMUSG00000046879	8.03963	-1.76324	6.06984e-29	4.38381e-27	410.823	453.928	415.923	346.494	103.517	161.57	133.279	80.918
ENSMUSG00000029177	6.2837	1.56185	7.79513e-29	5.56625e-27	30.99	35.038	48.564	42.472	142.946	103.893	92.166	124.747
ENSMUSG00000040557	2.85493	1.59988	7.90616e-29	5.61382e-27	3.075	2.866	4.261	3.693	10.969	11.28	9.819	10.132
ENSMUSG00000040584	5.37244	-1.21215	1.06776e-28	7.49748e-27	58.417	71.752	55.853	46.011	24.875	25.208	25.466	24.554
ENSMUSG00000069874	6.44077	-1.46839	1.93901e-28	1.33919e-26	132.451	141.829	134.705	102.281	38.911	59.504	49.176	37.137
ENSMUSG00000022885	6.82847	1.11269	2.78651e-28	1.90932e-26	60.857	67.156	86.963	71.864	162.639	145.906	138.787	173.006
ENSMUSG00000033213	1.68763	-2.63681	2.79472e-28	1.90932e-26	6.881	6.759	4.21	4.565	0.907	0.913	0.998	0.754
ENSMUSG00000002227	5.65586	-1.01279	3.48573e-28	2.36861e-26	63.932	78.295	67.199	60.681	33.858	34.524	36.084	29.266
ENSMUSG00000030737	3.01053	1.80879	3.63492e-28	2.45678e-26	3.514	3.082	3.902	3.385	10.84	13.517	9.62	14.845
ENSMUSG00000078922	4.05271	-3.67076	3.76882e-28	2.53373e-26	37.432	41.094	26.592	19.697	1.684	4.156	3.074	0.848
ENSMUSG00000036103	4.69856	1.03246	4.70193e-28	3.14432e-26	15.91	14.924	18.943	17.799	32.519	34.707	33.33	37.797
ENSMUSG00000052160	8.11433	-1.09491	5.32578e-28	3.54276e-26	415.947	437.166	352.215	305.151	178.531	186.733	166.209	175.692
ENSMUSG00000052776	7.2146	-1.6529	5.73288e-28	3.79361e-26	225.909	245.267	220.898	210.461	61.886	93.617	83.783	47.646
ENSMUSG00000031129	7.31863	1.25679	5.80447e-28	3.82097e-26	82.428	90.191	116.532	86.944	246.074	198.195	194.749	259.769
ENSMUSG00000038213	5.40712	-1.23978	6.37906e-28	4.17746e-26	64.469	69.59	58.215	46.729	25.393	28.77	24.628	22.386
ENSMUSG00000063800	5.53913	-1.06292	9.46549e-28	6.13509e-26	67.738	68.779	63.194	52.218	27.985	34.25	30.256	28.088
ENSMUSG00000070031	5.9471	-1.27186	1.04737e-27	6.75394e-26	93.165	103.276	88.4	64.785	33.944	40.689	33.928	36.241
ENSMUSG00000017830	7.17493	-1.42029	1.42594e-27	9.10223e-26	211.853	233.209	207.294	189.995	75.532	99.372	84.621	55.14
ENSMUSG00000033781	4.34541	-1.1387	1.56792e-27	9.95827e-26	28.598	30.064	30.288	23.185	11.833	12.969	12.653	13.479
ENSMUSG00000026896	6.85838	-1.29323	1.90872e-27	1.19756e-25	169.834	188.763	162.17	139.162	56.487	80.283	76.399	56.035
ENSMUSG00000045868	3.99498	-1.86538	2.66905e-27	1.63758e-25	24.548	29.577	24.025	22.723	4.664	9.681	7.704	5.608
ENSMUSG00000073412	5.97971	-1.1733	4.32061e-27	2.61283e-25	96.776	102.357	80.957	70.171	41.372	42.425	35.086	36.43
ENSMUSG00000035929	8.25425	-1.24993	4.97463e-27	2.99402e-25	498.034	496.049	384.403	341.775	180.561	204.634	180.26	157.831
ENSMUSG00000073242	2.78083	-1.52364	6.01685e-27	3.60412e-25	11.176	11.301	9.292	9.233	3.8	3.197	3.393	3.864
ENSMUSG00000038390	6.1942	-1.02143	6.33468e-27	3.7766e-25	86.284	107.115	108.524	90.945	48.066	44.617	44.666	56.223
ENSMUSG00000031304	6.04045	-1.35793	6.49285e-27	3.85273e-25	106.878	114.469	84.91	73.197	35.542	44.069	34.966	33.461
ENSMUSG00000045322	4.83695	-1.87252	6.61452e-27	3.88841e-25	54.318	59.641	36.962	29.648	11.272	13.609	11.336	13.102
ENSMUSG00000008734	3.50181	-1.34467	7.69908e-27	4.48427e-25	15.959	18.655	16.479	14.26	7.126	6.53	6.546	5.467
ENSMUSG00000025498	9.5398	-3.20759	1.38941e-26	8.01863e-25	1514.84	1602.18	1209.16	1049.13	109.39	236.19	177.146	59.098
ENSMUSG00000061232	10.808	-1.2141	1.66073e-26	9.5409e-25	2818.17	2847.61	2328.49	2029.01	1043.63	1215.02	1095.17	966.592
ENSMUSG00000074151	5.7864	-1.29147	1.84749e-26	1.05182e-24	79.256	89.812	74.283	70.735	28.373	38.908	36.164	24.789
ENSMUSG00000042675	5.81826	1.04456	3.57928e-26	2.00171e-24	33.332	38.823	42.711	31.905	75.662	75.853	66.26	85.019
ENSMUSG00000049502	7.46726	-1.36869	4.82195e-26	2.67301e-24	256.215	302.799	249.184	213.077	81.319	126.178	104.3	83.652
ENSMUSG00000079491	3.80603	-1.29981	4.95266e-26	2.73348e-24	19.375	23.629	18.789	18.158	8.637	9.179	7.784	6.834
ENSMUSG00000090942	2.54727	-2.61911	5.07831e-26	2.79064e-24	11.664	13.734	7.392	8.053	1.512	2.283	1.916	0.895
ENSMUSG00000081169	0.564982	-4.77009	5.99602e-26	3.28068e-24	3.807	3.731	2.207	1.641	0.13	0.046	0.08	0.141
ENSMUSG00000015312	6.09577	-1.01958	7.99634e-26	4.35628e-24	102.877	104.141	83.831	75.916	47.289	46.261	44.865	42.462
ENSMUSG00000074677	4.10686	-1.83505	8.99223e-26	4.8778e-24	30.746	35.741	22.536	19.441	5.96	8.814	7.704	7.917
ENSMUSG00000063268	5.9571	-1.24928	9.36776e-26	5.05979e-24	94.873	99.004	84.396	72.12	37.701	42.744	38.838	28.041
ENSMUSG00000028773	2.70656	-1.7616	1.04743e-25	5.63341e-24	8.248	11.247	10.729	10.464	3.325	2.238	3.712	2.639
ENSMUSG00000037731	8.19824	-1.21935	1.27837e-25	6.8463e-24	448.011	473.069	394.054	329.208	155.124	208.15	188.123	154.768
ENSMUSG00000073489	9.01658	-1.67346	1.48744e-25	7.93238e-24	811.299	887.308	776.866	680.011	224.136	332.593	270.11	162.355
ENSMUSG00000037849	6.65718	-3.61733	1.87975e-25	9.98244e-24	226.445	218.61	149.849	153.986	8.119	27.903	18.561	6.409
ENSMUSG00000027639	9.09819	-1.12911	2.30118e-25	1.21693e-23	779.431	869.14	759.514	601.325	317.115	402.966	330.263	325.559
ENSMUSG00000054404	9.35804	-1.30577	3.15942e-25	1.65693e-23	890.409	1060.66	986.008	801.476	342.811	462.059	414.286	293.041
ENSMUSG00000030107	5.83132	-2.32303	3.85611e-25	2.01394e-23	101.803	106.466	90.659	82.122	13.69	27.035	25.187	10.18
ENSMUSG00000032841	3.87551	-1.33812	4.77869e-25	2.48551e-23	21.18	20.709	20.38	22.211	6.91	9.042	10.538	6.834
ENSMUSG00000010358	5.99716	-1.79098	5.7988e-25	2.99147e-23	111.71	111.495	94.561	79.66	28.244	37.858	31.533	17.155
ENSMUSG00000068747	7.38964	1.36528	6.92484e-25	3.55785e-23	67.055	82.783	119.715	104.897	228.886	233.359	237.858	264.576
ENSMUSG00000026946	4.98067	-1.0084	7.14257e-25	3.65486e-23	44.313	47.583	41.428	35.701	21.377	21.783	22.393	18.38
ENSMUSG00000034118	4.94958	-1.14501	7.41629e-25	3.77962e-23	45.24	43.96	43.789	37.599	17.274	23.29	20.876	15.646
ENSMUSG00000037405	6.22351	-1.02574	7.91248e-25	4.0163e-23	96.435	120.525	103.031	81.353	47.159	53.522	48.019	48.4
ENSMUSG00000063388	0.934702	-5.16351	9.12887e-25	4.5968e-23	5.564	5.299	1.643	2.513	0.086	0.183	0.04	0.094
ENSMUSG00000043939	4.68569	-1.50785	9.47357e-25	4.75145e-23	49.633	43.149	30.031	30.059	13.129	13.472	14.769	12.347
ENSMUSG00000072109	3.37535	-2.28976	1.197e-24	5.95627e-23	20.107	24.008	14.785	10.874	3.541	4.749	3.273	2.686
ENSMUSG00000060550	3.66858	-3.01757	1.28246e-24	6.33165e-23	35.431	29.685	12.218	14.362	2.678	3.516	3.074	2.026
ENSMUSG00000026358	6.41839	-1.34038	2.43005e-24	1.19044e-22	112.1	104.466	115.66	158.91	50.441	47.859	57.758	37.797
ENSMUSG00000074578	4.40419	-1.35617	2.71802e-24	1.32637e-22	32.991	35.417	26.695	27.186	13.517	14.248	9.739	10.274
ENSMUSG00000025408	6.58641	-1.0755	4.00727e-24	1.93313e-22	136.502	135.286	125.516	124.492	63.138	69.14	69.533	45.667
ENSMUSG00000073491	6.04327	-3.47988	5.40788e-24	2.58902e-22	137.136	155.13	103.596	90.586	7.558	20.368	11.735	3.912
ENSMUSG00000017057	4.64721	-1.15987	5.65327e-24	2.69629e-22	36.797	38.931	32.65	30.469	13.172	18.952	15.687	14.327
ENSMUSG00000030187	2.63847	-2.28374	6.26471e-24	2.97668e-22	13.47	13.626	7.649	7.079	2.246	2.101	2.235	1.979
ENSMUSG00000024679	8.81629	-1.11193	6.61071e-24	3.12932e-22	685.339	738.18	548.062	494.479	280.969	303.092	265.081	291.863
ENSMUSG00000026104	8.06264	-1.53243	7.25347e-24	3.42077e-22	407.065	448.358	401.549	333.363	120.014	180.294	154.674	94.727
ENSMUSG00000090125	1.75313	-3.4997	8.32619e-24	3.91207e-22	8.443	8.273	4.62	3.847	0.389	0.639	0.958	0.189
ENSMUSG00000060675	4.26897	-1.32637	9.55216e-24	4.47147e-22	31.966	33.362	23.255	22.108	10.624	11.143	11.097	11.264
ENSMUSG00000031613	1.73528	2.2369	1.87304e-23	8.73556e-22	0.732	1.352	1.283	1.026	4.923	4.338	4.91	6.551
ENSMUSG00000054676	5.804	-1.17598	2.71082e-23	1.25044e-21	84.185	91.543	75.515	59.091	32.519	40.233	30.975	33.649
ENSMUSG00000021703	4.9543	1.14169	5.3959e-23	2.46205e-21	16.886	17.357	24.128	18.363	42.236	37.995	39.477	49.673
ENSMUSG00000090222	2.79469	-1.61381	7.51137e-23	3.40273e-21	11.078	11.733	10.421	8.874	3.369	4.475	3.433	2.451
ENSMUSG00000027219	4.95529	-1.22028	8.26602e-23	3.73122e-21	46.363	53.26	39.939	34.572	15.849	20.094	20.836	17.909
ENSMUSG00000055692	3.20854	1.31304	1.34109e-22	5.98939e-21	5.612	4.758	5.904	4.411	14.64	12.832	12.534	11.452
ENSMUSG00000004933	2.91762	1.50392	1.61528e-22	7.18857e-21	3.27	3.244	4.826	3.95	12.308	9.864	9.62	11.641
ENSMUSG00000029366	6.78631	-1.29879	1.64993e-22	7.29141e-21	170.664	173.136	145.589	139.059	54.717	72.382	80.59	47.646
ENSMUSG00000069793	6.21711	-1.17336	2.1668e-22	9.5091e-21	103.609	107.494	98.514	103.205	39.515	48.133	59.714	35.534
ENSMUSG00000025357	3.38413	1.30856	2.35223e-22	1.02165e-20	4.441	5.948	6.006	7.13	13.215	15.39	15.288	14.327
ENSMUSG00000040219	3.92026	1.1171	2.48285e-22	1.06737e-20	8.833	8.273	9.086	11.439	18.44	21.19	21.634	20.406
ENSMUSG00000022842	3.43081	-1.14297	3.44405e-22	1.46563e-20	16.398	13.788	13.655	15.645	6.867	6.987	7.025	6.032
ENSMUSG00000056596	1.74776	1.85098	4.03968e-22	1.70761e-20	1.22	1.244	1.643	1.385	5.053	4.293	5.189	5.325
ENSMUSG00000028327	4.55278	-1.01567	4.9068e-22	2.06723e-20	31.283	35.254	27.208	32.162	14.467	15.024	18.202	14.468
ENSMUSG00000026748	2.85995	1.58012	5.02172e-22	2.10862e-20	2.831	4.38	4.056	2.872	8.68	12.01	10.697	10.839
ENSMUSG00000105096	-0.151088	-6.68082	6.80595e-22	2.84836e-20	2.05	2.487	1.591	0.769	0.043	0	0	0
ENSMUSG00000054072	6.02378	-3.34116	1.06202e-21	4.40096e-20	139.088	158.537	104.263	74.069	6.91	22.194	12.653	5.184
ENSMUSG00000073490	9.02061	-1.01182	1.16723e-21	4.82112e-20	728.139	773.488	654.584	621.741	307.226	402.875	374.25	293.229
ENSMUSG00000038886	7.02057	1.17931	2.11086e-21	8.60618e-20	61.638	78.998	103.442	73.454	174.299	169.47	165.291	210.049
ENSMUSG00000058046	2.24644	-2.06202	3.89246e-21	1.5374e-19	10.541	8.489	5.955	5.848	1.771	1.644	2.235	1.697
ENSMUSG00000078153	4.4974	-1.16816	3.94874e-21	1.55477e-19	32.064	36.552	31.469	25.339	11.012	15.024	15.328	14.421
ENSMUSG00000032066	2.62675	-1.26432	5.41588e-21	2.11924e-19	9.077	9.192	8.624	8.053	3.628	3.836	3.712	3.346
ENSMUSG00000039960	2.25765	-1.75761	7.05473e-21	2.73511e-19	8.833	7.732	7.29	5.796	2.505	2.009	2.595	1.602
ENSMUSG00000036362	4.73172	-1.16065	7.32034e-21	2.82078e-19	43.874	41.905	30.134	31.29	15.461	16.44	15.368	18.615
ENSMUSG00000040328	1.90253	-2.67772	9.45259e-21	3.59853e-19	6.052	9.354	5.955	4.924	0.389	1.598	1.118	0.99
ENSMUSG00000017652	3.05228	-1.76633	1.15139e-20	4.33108e-19	11.957	17.249	11.499	11.08	2.505	4.293	4.75	3.629
ENSMUSG00000069892	4.9024	-1.24671	1.30538e-20	4.89575e-19	45.143	50.07	37.629	35.957	13.258	20.961	19.918	16.966
ENSMUSG00000028874	2.51935	-1.79402	1.57805e-20	5.90088e-19	9.956	11.625	7.803	6.514	2.418	2.74	2.275	2.922
ENSMUSG00000028459	7.20188	-1.78764	1.58828e-20	5.92161e-19	265.976	305.178	189.429	153.832	59.899	79.872	78.794	46.232
ENSMUSG00000057135	0.81692	-3.8042	1.76119e-20	6.50866e-19	4.88	4.001	2.772	1.488	0.216	0.274	0.239	0.189
ENSMUSG00000043740	6.35473	-1.02108	1.91945e-20	7.07288e-19	128.449	123.661	92.559	94.279	53.076	54.709	61.151	47.269
ENSMUSG00000078853	5.62002	-1.54478	2.16613e-20	7.91264e-19	71.838	89.109	76.593	56.321	22.673	34.935	25.546	17.532
ENSMUSG00000038065	2.60262	1.88083	2.78207e-20	1.01042e-18	1.659	2.758	3.696	1.898	9.242	8.448	8.063	11.122
ENSMUSG00000094796	1.52696	-2.73918	3.04389e-20	1.09919e-18	6.003	6.434	4.312	3.488	0.475	1.187	0.958	0.377
ENSMUSG00000030142	4.42444	-1.30678	3.55009e-20	1.27834e-18	26.842	36.39	34.703	24.929	10.84	14.659	10.258	13.95
ENSMUSG00000001166	3.92536	-1.16667	3.63231e-20	1.30422e-18	21.62	25.305	20.688	16.773	9.933	10.184	8.781	8.672
ENSMUSG00000047414	5.08372	-1.12671	5.64762e-20	2.00506e-18	45.387	44.933	42.917	53.192	17.361	20.642	27.941	19.322
ENSMUSG00000033880	10.4434	-1.08552	7.71934e-20	2.71013e-18	1985.35	2118.56	1835.31	1632.7	830.684	1051.71	978.575	707.011
ENSMUSG00000039109	3.31929	2.06834	1.07996e-19	3.72939e-18	4.783	3.136	3.594	3.437	17.922	10.732	11.256	22.998
ENSMUSG00000067203	4.77789	-1.05814	1.17493e-19	4.04632e-18	44.362	40.986	33.83	29.34	18.656	18.586	17.802	16.259
ENSMUSG00000040537	2.50024	1.40801	1.20253e-19	4.13011e-18	3.075	2.866	3.285	2.719	8.205	7.17	7.225	9.19
ENSMUSG00000032690	6.32974	-1.50227	1.59187e-19	5.4085e-18	125.863	137.773	108.935	103.82	44.482	53.659	45.265	24.695
ENSMUSG00000016494	1.08694	-2.15972	2.38472e-19	8.01609e-18	3.709	3.839	2.772	3.488	0.993	0.776	0.559	0.754
ENSMUSG00000073555	5.4313	-2.28976	2.74865e-19	9.16628e-18	78.524	81.161	70.792	57.45	9.112	24.204	17.523	8.012
ENSMUSG00000015852	5.83573	1.01467	3.19134e-19	1.05314e-17	35.187	39.58	42.455	33.444	80.499	72.656	60.153	91.192
ENSMUSG00000038776	5.12744	1.02541	3.62373e-19	1.18347e-17	18.789	21.466	29.415	21.851	46.641	46.032	42.151	51.511
ENSMUSG00000026222	7.75058	-1.01912	3.93441e-19	1.28163e-17	283.496	317.019	297.645	255.908	125.758	175.133	154.714	113.767
ENSMUSG00000067235	4.37265	-1.11576	5.31362e-19	1.71324e-17	31.527	32.172	25.719	24.262	14.122	15.298	12.454	10.557
ENSMUSG00000028152	2.8125	1.17931	7.95453e-19	2.53243e-17	3.904	4.109	3.748	4.976	9.155	9.499	9.34	9.944
ENSMUSG00000081219	2.50393	-1.53884	1.11558e-18	3.51616e-17	7.906	9.138	9.651	7.233	2.246	3.425	3.553	2.404
ENSMUSG00000057346	0.608468	-3.41893	1.23655e-18	3.88775e-17	3.855	2.812	2.926	1.436	0.259	0.411	0.16	0.189
ENSMUSG00000024401	3.1972	-1.17378	1.25753e-18	3.9439e-17	12.689	14.816	10.678	12.824	6.089	5.982	5.548	4.948
ENSMUSG00000091705	4.29197	-1.20704	1.30839e-18	4.08314e-17	29.721	31.74	25.411	22.826	10.149	15.024	12.374	9.944
ENSMUSG00000023959	1.00765	-3.818	2.3255e-18	7.06537e-17	5.71	4.866	2.926	1.59	0.086	0.183	0.399	0.377
ENSMUSG00000034265	5.83794	1.01133	3.61854e-18	1.08634e-16	33.43	42.067	42.301	33.341	88.1	66.994	63.506	86.055
ENSMUSG00000069893	5.13572	-1.3134	3.93731e-18	1.17645e-16	47.632	61.479	47.486	44.575	12.869	22.925	22.752	22.386
ENSMUSG00000046031	4.53589	-1.80586	4.9452e-18	1.47064e-16	41.385	47.475	35.011	21.339	9.026	14.248	7.863	10.415
ENSMUSG00000002602	6.45351	-1.23908	5.27572e-18	1.56526e-16	143.578	148.371	104.468	96.639	47.246	66.72	51.731	43.169
ENSMUSG00000020034	5.09657	1.23072	5.8644e-18	1.73178e-16	15.568	19.303	26.027	20.313	49.362	43.658	38.758	58.863
ENSMUSG00000053411	2.97268	1.39248	1.10741e-17	3.17381e-16	3.416	3.731	5.698	4.001	12.394	9.362	10.298	12.206
ENSMUSG00000073421	4.42994	-1.18555	1.52712e-17	4.35486e-16	34.064	37.958	24.487	23.647	13.517	13.563	12.174	13.573
ENSMUSG00000003420	6.89112	1.06483	2.28997e-17	6.46047e-16	72.765	81.107	89.478	63.144	170.326	151.706	123.26	195.957
ENSMUSG00000064105	3.79791	1.14087	2.50687e-17	7.00982e-16	6.93	8.219	10.678	8.361	20.772	18.13	15.926	20.595
ENSMUSG00000029561	8.11085	-1.72352	3.54613e-17	9.87214e-16	428.929	451.008	435.585	383.067	106.54	187.052	151.52	69.184
ENSMUSG00000038648	4.10961	1.08833	3.91645e-17	1.08315e-15	9.126	10.219	11.089	13.183	20.254	21.464	23.071	27.994
ENSMUSG00000048852	1.33079	-2.08547	3.98332e-17	1.09924e-15	4.783	4.542	4.107	2.821	0.605	1.096	1.078	1.037
ENSMUSG00000095788	2.0467	-2.21132	4.67965e-17	1.28579e-15	9.224	8.76	4.62	4.822	1.08	1.872	1.277	1.697
ENSMUSG00000036278	3.67412	1.13623	6.3175e-17	1.72084e-15	6.296	7.191	10.267	7.643	19.002	17.171	15.607	17.249
ENSMUSG00000055413	4.45142	-1.00292	1.01517e-16	2.70692e-15	32.552	33.47	25.873	25.083	16.843	15.298	13.891	12.3
ENSMUSG00000028832	6.70969	1.44207	1.51535e-16	3.99844e-15	44.118	35.471	65.607	79.353	156.377	138.463	160.022	155.333
ENSMUSG00000003153	3.70563	1.10543	1.72774e-16	4.52111e-15	8.15	5.894	8.83	9.643	17.663	15.298	18.162	18.945
ENSMUSG00000020357	1.3746	-2.79165	3.02143e-16	7.74601e-15	6.198	4.975	4.723	2.308	0.864	0.822	0.718	0.189
ENSMUSG00000024397	6.6357	-1.21445	4.11154e-16	1.04981e-14	162.562	175.028	121.461	97.46	60.504	72.291	54.006	53.019
ENSMUSG00000031444	2.43556	-1.24951	5.06518e-16	1.27527e-14	7.223	7.083	8.778	7.386	2.591	3.334	3.313	3.582
ENSMUSG00000072844	1.67471	-2.04385	5.22758e-16	1.31355e-14	6.686	6.543	3.85	3.539	1.08	1.279	1.437	1.178
ENSMUSG00000056144	5.42974	-1.05075	6.77964e-16	1.67687e-14	58.027	63.48	60.833	50.576	23.018	33.52	33.849	21.962
ENSMUSG00000103219	1.28204	-1.70452	7.58886e-16	1.86606e-14	3.855	3.461	3.594	3.847	1.296	1.416	0.958	0.848
ENSMUSG00000003032	3.24337	-1.04787	8.31401e-16	2.03645e-14	12.591	15.032	11.807	11.746	6.478	5.252	6.826	6.127
ENSMUSG00000076431	2.84783	1.18661	9.15619e-16	2.22821e-14	3.758	3.785	3.85	5.694	9.544	9.179	10.378	9.803
ENSMUSG00000036223	1.95835	1.34876	9.74819e-16	2.36029e-14	1.855	1.784	2.361	2.36	5.226	5.526	5.309	5.278
ENSMUSG00000020953	-0.485886	-4.70326	1.06766e-15	2.57031e-14	1.366	1.947	1.181	0.667	0	0	0.08	0.094
ENSMUSG00000024164	5.6308	-1.76124	1.17395e-15	2.81548e-14	90.285	105.385	59.293	52.167	23.32	32.332	20.038	14.892
ENSMUSG00000068129	2.18001	-1.9126	1.23391e-15	2.95368e-14	9.175	9.517	4.826	5.335	1.641	2.329	1.756	1.932
ENSMUSG00000076617	2.59749	3.20104	1.54353e-15	3.66016e-14	1.513	1.406	1.129	0.513	9.026	7.033	4.83	21.302
ENSMUSG00000052477	2.51771	-1.42946	1.58224e-15	3.73792e-14	8.443	10.274	8.47	6.361	2.634	3.334	3.792	2.639
ENSMUSG00000033857	4.47837	1.01159	1.63075e-15	3.84533e-14	12.494	15.032	18.327	12.721	29.971	28.862	24.947	34.356
ENSMUSG00000019996	1.93709	1.45276	1.66002e-15	3.90708e-14	1.659	2.163	2.053	1.949	5.916	4.658	4.83	6.032
ENSMUSG00000047604	3.1041	1.62499	2.00908e-15	4.69367e-14	3.026	3.785	6.366	3.232	13.042	11.691	10.099	15.835
ENSMUSG00000002055	4.36252	1.04628	2.05492e-15	4.78855e-14	11.029	10.274	15.144	16.619	26.905	28.907	28.779	25.025
ENSMUSG00000041064	2.81975	1.38705	2.36431e-15	5.49312e-14	2.977	3.082	3.44	5.642	10.581	8.996	10.378	9.661
ENSMUSG00000037224	2.91611	1.352	3.39545e-15	7.78858e-14	3.123	3.515	5.185	4.719	8.81	12.33	9.42	11.735
ENSMUSG00000024610	6.43257	-1.09326	3.50111e-15	8.01641e-14	142.114	144.749	101.491	82.584	57.869	58.18	50.533	54.15
ENSMUSG00000028480	3.96932	-1.29171	3.82581e-15	8.74402e-14	24.987	28.658	17.454	18.261	9.199	11.462	7.784	8.059
ENSMUSG00000006362	2.19584	1.39785	7.04514e-15	1.57599e-13	1.708	2.271	2.772	2.924	6.132	5.48	6.985	6.881
ENSMUSG00000036594	4.50228	-1.23443	8.18391e-15	1.81786e-13	40.799	38.715	25.668	22.416	13.215	14.202	13.052	13.761
ENSMUSG00000079049	2.29762	-1.41543	1.1332e-14	2.48224e-13	7.564	6.272	7.033	7.745	2.418	3.699	2.754	1.838
ENSMUSG00000024677	7.98285	-1.00103	1.20763e-14	2.63614e-13	348.355	425	322.903	253.754	154.692	198.652	146.132	175.08
ENSMUSG00000060594	2.566	1.25568	1.84621e-14	3.92173e-13	2.538	3.19	4.107	3.693	7.601	8.448	9.141	7.069
ENSMUSG00000052911	2.11311	1.40407	1.88976e-14	4.00749e-13	2.928	2.704	1.899	1.539	5.916	6.119	6.307	5.702
ENSMUSG00000000791	1.85172	-2.024	2.30526e-14	4.83989e-13	7.076	7.516	5.493	3.232	1.641	1.05	1.197	1.838
ENSMUSG00000039232	3.32194	-1.06984	2.60644e-14	5.43611e-13	12.982	15.735	11.294	14.311	7.342	5.937	7.185	5.325
ENSMUSG00000068417	2.44303	-1.39454	3.53673e-14	7.20979e-13	8.882	7.786	6.571	8.31	2.591	3.745	3.592	2.026
ENSMUSG00000022494	2.26684	1.33981	3.54328e-14	7.21152e-13	1.903	2.812	2.772	3.026	5.916	7.398	5.828	7.493
ENSMUSG00000078486	2.42516	-1.25976	3.60338e-14	7.32204e-13	7.467	9.354	6.417	7.13	3.109	3.745	3.113	2.686
ENSMUSG00000036526	2.75311	-1.55615	3.72503e-14	7.55709e-13	10.493	13.302	9.6	7.13	2.375	4.475	3.752	3.158
ENSMUSG00000022421	2.07961	1.33048	4.03209e-14	8.15386e-13	3.075	1.784	2.105	2.206	6.046	6.119	5.429	5.608
ENSMUSG00000044749	0.0951735	2.7888	4.13361e-14	8.3458e-13	0.244	0.108	0.257	0.308	1.339	1.598	1.477	2.121
ENSMUSG00000021186	3.32926	1.19441	4.28952e-14	8.64678e-13	4.49	4.812	7.598	7.027	12.826	12.193	14.489	15.269
ENSMUSG00000082419	3.10854	-1.04647	5.87583e-14	1.16585e-12	13.128	13.085	11.037	9.284	5.657	5.845	5.947	5.043
ENSMUSG00000009614	2.08128	1.33056	6.72921e-14	1.32684e-12	2.635	2.109	2.259	2.206	4.923	5.526	5.748	7.069
ENSMUSG00000096606	0.931319	1.82173	7.20864e-14	1.41037e-12	0.781	0.649	1.078	0.564	2.591	2.603	2.954	2.781
ENSMUSG00000052942	2.15822	1.35484	7.40673e-14	1.44689e-12	2.879	2.109	2.618	2	5.096	6.256	5.947	7.399
ENSMUSG00000090881	1.52825	-2.1135	9.98688e-14	1.92122e-12	4.831	6.651	3.594	3.744	0.777	0.913	1.796	0.801
ENSMUSG00000073418	1.81039	-2.9699	1.25725e-13	2.404e-12	10.005	9.408	3.183	2.616	0.518	0.913	0.918	0.848
ENSMUSG00000097194	2.63021	-1.40083	1.28624e-13	2.45571e-12	10.444	11.031	8.008	6.566	2.937	4.11	3.792	2.781
ENSMUSG00000035042	5.09034	-3.49926	1.4613e-13	2.76487e-12	103.853	84.351	29.21	34.829	4.405	11.965	4.271	1.649
ENSMUSG00000025279	1.36087	-2.5468	1.59058e-13	2.99602e-12	5.71	6.272	3.131	2.513	1.08	0.32	0.918	0.66
ENSMUSG00000021846	4.58047	1.11467	1.87994e-13	3.52008e-12	11.517	17.898	18.224	12.311	32.605	30.323	26.863	40.012
ENSMUSG00000079685	3.99532	1.02908	2.80535e-13	5.13866e-12	8.833	8.273	10.832	13.439	20.038	18.449	21.594	24.412
ENSMUSG00000025577	2.43455	1.10394	3.59524e-13	6.49146e-12	3.709	3.136	3.337	3.078	7.126	6.165	7.265	8.012
ENSMUSG00000033952	4.76792	1.28776	3.73814e-13	6.73026e-12	10.785	11.842	18.84	21.236	31.31	35.346	43.987	42.462
ENSMUSG00000060586	3.94001	-1.14056	3.87665e-13	6.9598e-12	26.5	25.359	16.427	16.414	9.112	10.001	8.861	10.462
ENSMUSG00000090231	2.00528	-2.52515	4.21863e-13	7.50232e-12	8.833	9.679	4.415	4.77	0.777	2.055	1.477	0.471
ENSMUSG00000039699	2.74516	-1.37948	4.3654e-13	7.73833e-12	10.395	11.355	9.908	7.233	2.418	4.019	4.75	3.723
ENSMUSG00000030711	2.48946	1.54244	5.60771e-13	9.78949e-12	2.684	2.163	3.953	2.257	9.846	9.362	5.748	7.352
ENSMUSG00000022240	1.10895	-2.17995	6.05682e-13	1.05444e-11	3.953	3.461	2.926	3.693	1.296	0.685	0.878	0.189
ENSMUSG00000024430	1.15138	-1.67904	7.28135e-13	1.2538e-11	3.514	3.461	2.823	3.591	1.209	1.416	0.838	0.707
ENSMUSG00000023963	-0.134488	3.01444	9.11159e-13	1.55834e-11	0.098	0.216	0.205	0.154	1.209	1.324	1.078	1.979
ENSMUSG00000046329	2.23193	1.3217	9.50984e-13	1.62206e-11	1.952	1.892	2.823	3.642	6.737	6.302	6.227	6.551
ENSMUSG00000044485	0.552974	-2.09894	1.00602e-12	1.70672e-11	2.343	2.649	2.105	2.206	0.864	0.548	0.279	0.471
ENSMUSG00000033355	7.61004	-1.41572	1.18167e-12	1.98342e-11	292.476	302.258	291.28	251.548	90.216	154.948	123.3	57.873
ENSMUSG00000019874	3.02744	-1.40045	1.25761e-12	2.09973e-11	14.202	10.76	7.598	14.875	3.671	4.658	5.508	4.1
ENSMUSG00000027200	1.30989	1.90345	1.71424e-12	2.81015e-11	1.122	0.811	1.027	0.923	4.664	2.694	2.674	4.619
ENSMUSG00000031762	4.18086	1.1227	1.76303e-12	2.88266e-11	8.736	8.057	13.245	15.029	24.314	22.012	24.668	27.193
ENSMUSG00000054843	3.39065	1.23865	1.79771e-12	2.93178e-11	5.368	7.029	6.417	5.694	15.288	11.417	11.376	19.794
ENSMUSG00000097597	3.44456	-1.53171	2.06724e-12	3.33689e-11	23.474	19.033	11.14	11.387	5.053	7.17	5.229	5.043
ENSMUSG00000018334	2.30018	1.17958	2.12483e-12	3.41676e-11	3.123	2.433	3.08	2.975	5.398	6.439	6.786	7.776
ENSMUSG00000047250	3.6903	1.07355	2.64437e-12	4.19877e-11	8.199	9.679	8.368	6.514	19.822	15.253	13.412	20.501
ENSMUSG00000026463	1.39508	1.93887	3.14881e-12	4.95916e-11	0.634	0.919	1.745	0.769	2.807	4.293	3.752	4.807
ENSMUSG00000027331	4.49609	1.06547	3.24953e-12	5.10197e-11	10.834	11.139	15.914	19.851	30.533	29.912	33.05	27.334
ENSMUSG00000095028	3.30585	-1.62419	3.27898e-12	5.14181e-11	21.522	17.519	13.039	8.002	3.8	5.343	4.79	5.561
ENSMUSG00000026955	1.41447	1.62029	3.95439e-12	6.11744e-11	0.781	1.298	1.232	1.59	4.362	3.288	4.271	3.11
ENSMUSG00000078780	2.9129	-1.2001	4.26045e-12	6.58286e-11	12.982	11.625	9.446	8.002	4.016	4.932	3.792	5.608
ENSMUSG00000013419	1.68045	1.37972	5.55963e-12	8.47626e-11	1.318	1.947	1.591	1.898	5.096	4.475	4.431	3.535
ENSMUSG00000005533	3.27067	1.08655	7.17621e-12	1.08363e-10	7.711	5.894	5.134	5.437	15.417	11.28	10.578	14.185
ENSMUSG00000011256	4.79517	1.01047	9.81857e-12	1.45825e-10	15.715	16.87	23.512	17.03	31.871	36.26	30.416	48.872
ENSMUSG00000026170	5.17676	1.00945	1.01822e-11	1.51047e-10	19.277	25.359	30.596	20.261	47.418	47.539	36.962	60.371
ENSMUSG00000064147	0.843336	2.26162	1.50624e-11	2.18319e-10	0.976	0.054	0.719	0.462	3.282	2.329	2.435	2.781
ENSMUSG00000059108	1.27673	-1.55591	1.67086e-11	2.41072e-10	4.295	4.218	2.721	3.078	1.339	1.233	1.277	0.99
ENSMUSG00000046768	2.36365	1.09542	1.82439e-11	2.62625e-10	2.928	2.704	3.748	3.283	7.903	5.891	6.866	6.409
ENSMUSG00000022468	0.932212	-1.61359	1.85183e-11	2.65969e-10	2.928	3.515	2.618	2.257	0.907	1.05	0.918	0.801
ENSMUSG00000017716	4.81441	1.04984	2.24636e-11	3.1865e-10	14.055	13.247	19.251	26.109	37.226	36.853	40.554	35.817
ENSMUSG00000060183	-0.886247	-7.37629	2.67551e-11	3.74898e-10	1.025	2.271	0.359	0.256	0	0	0	0
ENSMUSG00000032218	5.20733	1.52733	3.19496e-11	4.43748e-10	12.006	10.706	22.947	29.802	52.773	50.279	60.552	53.961
ENSMUSG00000028362	0.815139	-1.90772	3.44114e-11	4.75849e-10	3.319	3.028	2.772	1.795	0.389	0.868	0.838	0.801
ENSMUSG00000004709	2.98441	-1.29799	3.53987e-11	4.879e-10	13.079	14.275	10.37	7.438	5.614	4.521	4.79	3.393
ENSMUSG00000037628	2.94484	1.29605	3.55189e-11	4.89024e-10	3.319	2.595	6.006	5.386	10.84	10.275	11.576	9.85
ENSMUSG00000103588	-1.04018	-4.00463	3.70758e-11	5.09349e-10	1.22	0.703	0.667	0.564	0.086	0	0.04	0.047
ENSMUSG00000052270	1.64802	-2.36996	4.02456e-11	5.49314e-10	7.467	8.111	3.029	2.565	0.95	1.461	0.958	0.707
ENSMUSG00000091144	2.05005	-1.47862	4.93603e-11	6.68666e-10	7.223	8.273	4.569	4.36	1.987	2.101	2.036	2.639
ENSMUSG00000092564	1.99931	-1.15911	5.41284e-11	7.29349e-10	5.368	6.705	5.236	4.719	2.202	2.786	2.195	2.686
ENSMUSG00000022586	-0.781662	-3.17039	5.94287e-11	7.93995e-10	1.025	0.973	0.667	1.077	0	0.091	0.12	0.189
ENSMUSG00000032515	3.16103	-1.01657	6.45484e-11	8.60577e-10	12.933	14.707	10.883	9.438	6.651	6.713	5.149	5.184
ENSMUSG00000029322	1.32526	-2.2429	8.02671e-11	1.05897e-09	7.467	3.893	2.361	2.719	0.95	1.05	0.798	0.66
ENSMUSG00000109408	1.32732	-1.38443	8.45246e-11	1.11398e-09	4.441	3.136	3.491	3.232	1.209	1.598	1.437	1.225
ENSMUSG00000050751	1.39902	1.34868	8.69361e-11	1.14143e-09	1.171	1.352	1.643	1.436	3.282	3.653	3.193	4.194
ENSMUSG00000031004	7.08251	1.00678	9.34778e-11	1.22178e-09	74.424	65.588	87.887	131.673	164.15	169.014	198.541	190.868
ENSMUSG00000049422	2.10778	-1.23352	9.71047e-11	1.26657e-09	7.076	5.677	4.364	6.976	3.109	2.42	2.395	2.309
ENSMUSG00000025324	3.09297	-1.10259	1.01479e-10	1.31916e-09	11.859	11.247	11.448	12.054	4.059	6.393	7.225	3.959
ENSMUSG00000051790	2.14374	1.0368	1.10317e-10	1.42421e-09	2.733	3.136	2.669	2.616	5.485	5.891	6.426	5.043
ENSMUSG00000022021	4.80107	1.01316	1.27648e-10	1.63791e-09	15.08	13.031	19.354	25.75	37.615	36.945	41.552	31.67
ENSMUSG00000025582	0.344886	2.19621	1.31439e-10	1.68485e-09	0.342	0.433	0.411	0.41	1.512	1.964	2.555	1.32
ENSMUSG00000098318	1.75655	1.62333	1.60408e-10	2.02335e-09	1.025	0.811	2.618	1.795	5.226	4.43	4.989	4.666
ENSMUSG00000020808	4.02352	1.25827	2.00806e-10	2.50294e-09	7.076	5.569	11.807	13.285	21.377	20.916	25.546	22.48
ENSMUSG00000091373	1.78597	-1.29931	2.22328e-10	2.7576e-09	6.003	4.704	4.415	4.36	2.116	2.649	1.517	1.649
ENSMUSG00000079457	-0.841753	-4.24666	2.35512e-10	2.90971e-09	1.562	0.973	0.411	0.821	0	0.183	0	0
ENSMUSG00000016529	1.82649	-1.41041	2.40801e-10	2.95868e-09	6.735	5.894	4.004	3.898	2.159	2.283	1.716	1.555
ENSMUSG00000003779	5.34967	1.17414	2.52832e-10	3.09646e-09	19.375	15.194	29.005	35.906	50.225	58.956	61.63	53.726
ENSMUSG00000032561	1.80493	1.3393	3.09795e-10	3.73973e-09	2.099	2.109	1.951	1.385	5.744	4.978	3.393	5.043
ENSMUSG00000037995	1.42284	-2.1013	4.47273e-10	5.32807e-09	6.393	5.786	2.515	2.667	0.777	0.776	1.557	0.895
ENSMUSG00000006235	2.01589	1.13499	5.20606e-10	6.16677e-09	1.952	2.541	2.977	2.257	4.448	5.571	5.149	6.221
ENSMUSG00000026581	0.743386	-2.57103	5.35089e-10	6.31465e-09	3.953	4.326	1.54	1.539	0.518	0.776	0.319	0.283
ENSMUSG00000034413	2.24357	1.0721	6.02047e-10	7.0391e-09	2.05	2.704	3.388	3.642	5.744	6.119	6.626	6.268
ENSMUSG00000032549	1.89375	1.2119	7.02003e-10	8.13256e-09	2.099	2.055	2.207	2.206	4.103	6.576	4.471	4.76
ENSMUSG00000086763	3.04654	-1.00805	7.34451e-10	8.47738e-09	14.006	11.842	9.292	8.977	5.139	6.348	5.947	4.477
ENSMUSG00000031906	1.28547	1.38251	7.57684e-10	8.7296e-09	1.659	0.865	1.283	1.231	3.153	3.471	2.834	3.817
ENSMUSG00000081723	2.10144	-1.08951	8.79135e-10	1.00465e-08	5.808	6.326	4.877	6.258	3.023	2.694	1.996	3.252
ENSMUSG00000026622	4.47018	1.05915	9.89816e-10	1.12099e-08	11.664	9.408	15.298	20.467	30.101	29.684	33.41	25.261
ENSMUSG00000055110	-0.599182	-4.26939	1.08939e-09	1.22826e-08	1.464	2.271	0.565	0.359	0	0.091	0.08	0.047
ENSMUSG00000067199	2.50642	1.50386	1.09047e-09	1.22839e-08	1.806	2.325	4.312	3.026	8.896	8.357	5.069	10.274
ENSMUSG00000086813	1.04063	-1.90615	1.16514e-09	1.30667e-08	2.782	4.326	3.44	2.36	0.993	1.416	0.639	0.377
ENSMUSG00000021453	4.04696	-1.09598	1.17188e-09	1.31307e-08	27.818	22.602	20.175	19.646	10.926	14.659	10.019	6.598
ENSMUSG00000026605	5.16517	1.10524	1.19728e-09	1.33915e-08	17.715	14.653	24.282	33.752	42.884	48.224	55.722	47.693
ENSMUSG00000038037	1.64242	-1.39379	1.25467e-09	1.4021e-08	5.856	4.488	4.21	3.385	1.296	2.238	1.956	1.32
ENSMUSG00000085287	1.97736	1.11593	1.39965e-09	1.55724e-08	2.684	2.271	2.31	2.257	5.701	6.165	4.231	4.619
ENSMUSG00000037725	3.96444	1.10613	1.52862e-09	1.68883e-08	6.588	7.3	10.729	14.414	19.909	19.18	22.792	22.15
ENSMUSG00000018925	-1.37548	-5.21961	1.53761e-09	1.69342e-08	0.634	1.081	0.616	0.154	0	0	0.04	0
ENSMUSG00000049281	2.78317	1.00577	1.54998e-09	1.70498e-08	3.172	4.001	5.75	4.924	9.933	8.403	7.903	9.614
ENSMUSG00000022534	3.40036	-1.10609	1.68613e-09	1.84351e-08	16.886	19.141	12.372	9.438	7.169	7.307	6.387	5.985
ENSMUSG00000063234	1.20792	-1.50975	1.68886e-09	1.8449e-08	3.563	4.218	2.618	3.129	1.512	1.507	0.958	0.754
ENSMUSG00000035852	-0.418407	-2.28153	1.91288e-09	2.07527e-08	1.269	1.406	1.027	0.872	0.216	0.228	0.2	0.283
ENSMUSG00000035121	1.64998	1.21047	3.15997e-09	3.32824e-08	1.855	1.73	1.232	2.36	4.319	3.471	4.55	4.289
ENSMUSG00000021697	1.93867	1.28299	3.35967e-09	3.51805e-08	1.757	1.46	2.259	3.026	4.621	4.293	6.426	5.373
ENSMUSG00000078349	1.54114	-1.21767	3.539e-09	3.68751e-08	4.49	4.434	3.696	3.488	1.684	2.238	1.756	1.225
ENSMUSG00000047473	0.859318	1.4992	3.766e-09	3.91434e-08	0.83	0.865	1.078	0.718	2.073	2.831	2.116	2.922
ENSMUSG00000038235	0.963298	-1.47511	4.44957e-09	4.5722e-08	2.733	3.515	2.823	2.206	1.296	1.187	0.758	0.801
ENSMUSG00000052291	0.838917	1.58307	5.13203e-09	5.23516e-08	0.683	0.595	0.719	1.282	2.937	2.557	1.996	2.404
ENSMUSG00000101191	0.925768	-1.38356	6.35531e-09	6.37498e-08	2.245	3.244	2.31	2.975	0.993	1.05	1.197	0.848
ENSMUSG00000021758	-0.856542	-3.68052	6.36218e-09	6.37681e-08	1.025	1.514	0.873	0.256	0.043	0.137	0.04	0.047
ENSMUSG00000059430	3.48575	1.05913	6.44688e-09	6.45148e-08	9.712	5.407	6.109	7.233	14.942	19.18	14.13	11.169
ENSMUSG00000074973	0.438181	-1.49527	6.64021e-09	6.62397e-08	2.001	1.73	2.002	1.949	0.691	0.548	0.758	0.707
ENSMUSG00000059900	0.955322	-1.74579	7.44305e-09	7.38984e-08	3.904	2.649	1.899	3.283	0.821	1.37	0.519	0.801
ENSMUSG00000009376	1.57057	-1.28372	8.97493e-09	8.78654e-08	4.343	4.758	3.029	4.565	1.555	2.009	2.116	1.131
ENSMUSG00000054128	0.817561	-1.47944	9.68472e-09	9.45214e-08	2.294	3.298	2.567	2	0.864	0.731	1.158	0.848
ENSMUSG00000068606	-0.682197	-3.30144	9.8528e-09	9.60876e-08	1.708	1.244	0.462	0.667	0	0.137	0.16	0.094
ENSMUSG00000055760	2.60811	-1.00485	1.15447e-08	1.11214e-07	7.028	7.516	8.265	9.695	3.714	5.343	4.191	2.922
ENSMUSG00000027827	1.02229	-1.58739	1.20084e-08	1.15242e-07	4.002	3.19	2.053	2.719	0.605	1.05	1.357	0.943
ENSMUSG00000020330	5.2207	1.14952	1.25017e-08	1.19613e-07	16.495	13.68	27.003	34.829	48.714	50.416	55.722	49.296
ENSMUSG00000054580	1.43519	-1.24366	1.43295e-08	1.36276e-07	4.539	3.947	3.44	3.078	1.252	1.781	1.996	1.272
ENSMUSG00000031480	0.870136	1.47692	1.70889e-08	1.61151e-07	0.488	0.757	1.283	1.026	2.375	2.329	2.834	2.356
ENSMUSG00000089844	1.03453	-1.76654	1.84998e-08	1.73843e-07	4.099	3.839	2.875	1.693	0.648	1.416	0.718	0.895
ENSMUSG00000109729	0.496836	-2.07037	2.03898e-08	1.8963e-07	2.928	2.541	2.31	1.077	0.302	0.731	0.718	0.33
ENSMUSG00000045094	-0.407527	-2.21061	2.17846e-08	2.01564e-07	1.513	1.19	0.821	1.026	0.259	0.365	0.16	0.189
ENSMUSG00000024544	1.78488	1.11343	2.29516e-08	2.11586e-07	2.001	2.379	2.207	1.744	4.319	3.79	4.111	5.844
ENSMUSG00000028602	0.964677	-1.16109	2.51348e-08	2.30369e-07	2.587	2.649	2.721	2.565	1.166	1.233	1.078	1.225
ENSMUSG00000071723	2.16454	1.05557	2.57291e-08	2.35645e-07	2.635	1.947	3.234	3.385	4.491	6.256	6.107	6.504
ENSMUSG00000043051	1.40022	1.09522	3.10093e-08	2.79548e-07	1.855	1.622	1.437	1.436	3.455	3.699	2.994	3.487
ENSMUSG00000037493	1.47631	1.39572	3.17103e-08	2.84852e-07	0.927	2.163	1.694	1.026	4.275	3.06	3.353	4.571
ENSMUSG00000034488	1.78926	1.10464	3.21806e-08	2.88666e-07	1.903	2.595	1.899	2	4.275	3.653	4.391	5.75
ENSMUSG00000009185	1.03134	-2.0458	3.26898e-08	2.92818e-07	4.441	4.975	2.053	1.59	0.95	1.005	0.758	0.424
ENSMUSG00000031434	0.635748	1.51327	3.5906e-08	3.20265e-07	0.732	0.649	0.513	1.026	1.814	1.872	2.475	2.215
ENSMUSG00000097457	-0.827321	-2.94573	3.96044e-08	3.49797e-07	1.269	1.081	0.513	0.667	0.259	0.091	0.04	0.047
ENSMUSG00000068101	2.01398	1.1453	4.45139e-08	3.9016e-07	2.147	1.568	3.029	2.872	6.521	5.617	5.029	4.147
ENSMUSG00000036322	2.38366	-1.0034	4.6303e-08	4.04651e-07	8.394	7.3	6.776	5.283	3.282	4.293	2.634	3.676
ENSMUSG00000034987	1.42665	-1.21315	5.19983e-08	4.51688e-07	4.392	4.596	3.029	2.821	1.727	1.644	1.637	1.367
ENSMUSG00000030882	1.03137	-1.36474	5.29413e-08	4.57992e-07	2.977	3.352	2.156	3.078	1.512	0.776	0.918	1.272
ENSMUSG00000039058	-0.0810585	1.87452	8.88317e-08	7.39134e-07	0.439	0.433	0.257	0.256	1.123	1.279	1.637	1.084
ENSMUSG00000042155	1.72301	1.03558	8.90477e-08	7.40443e-07	2.099	1.73	2.002	2.411	4.448	5.023	4.071	3.393
ENSMUSG00000039814	1.67065	1.22242	9.24532e-08	7.6624e-07	1.269	1.46	1.643	2.872	3.8	4.156	4.989	3.959
ENSMUSG00000037455	1.33592	1.0992	9.36793e-08	7.73865e-07	1.415	1.73	1.489	1.436	3.325	3.105	2.794	3.817
ENSMUSG00000004187	1.37468	1.22268	1.14548e-07	9.33444e-07	1.122	1.838	1.797	1.128	3.369	2.968	3.074	4.336
ENSMUSG00000024968	0.767795	1.28691	1.16941e-07	9.52327e-07	1.074	0.649	1.027	0.872	2.246	2.466	1.996	2.215
ENSMUSG00000040929	0.22634	1.64766	1.21125e-07	9.8324e-07	0.439	0.595	0.616	0.359	1.857	1.416	1.277	1.791
ENSMUSG00000023092	1.58456	1.28596	1.29265e-07	1.04262e-06	2.294	1.514	1.335	1.436	3.455	5.617	4.031	3.016
ENSMUSG00000102437	-0.329351	-2.09768	1.3007e-07	1.04777e-06	1.171	1.406	0.77	1.436	0.086	0.411	0.279	0.33
ENSMUSG00000034353	1.99215	1.4856	1.3148e-07	1.05723e-06	1.122	1.46	3.285	2.154	4.88	4.795	4.51	8.342
ENSMUSG00000045551	-0.488404	-2.54463	1.33038e-07	1.06828e-06	1.366	1.676	0.565	0.872	0.086	0.365	0.16	0.141
ENSMUSG00000053846	-0.601293	-2.72717	1.50435e-07	1.19657e-06	1.171	1.784	0.513	0.718	0.259	0.046	0.16	0.141
ENSMUSG00000021485	1.15834	1.35783	1.55189e-07	1.23051e-06	1.562	0.757	0.821	1.488	3.066	2.786	3.712	2.356
ENSMUSG00000097534	1.39898	-1.14014	1.67197e-07	1.31828e-06	4.392	3.623	3.748	2.513	1.512	1.69	1.796	1.461
ENSMUSG00000009545	-0.537846	2.37502	1.72063e-07	1.35327e-06	0.098	0.27	0.051	0.308	0.777	0.868	0.838	1.367
ENSMUSG00000045777	-0.385915	-2.32651	2.01677e-07	1.56476e-06	2.001	1.081	0.77	0.821	0.216	0.137	0.319	0.236
ENSMUSG00000025165	-0.93681	-4.14254	2.04625e-07	1.58666e-06	1.366	1.568	0.462	0.103	0.043	0	0.04	0.094
ENSMUSG00000000562	0.733636	-1.49425	2.11902e-07	1.63706e-06	2.001	3.136	2.823	1.641	0.821	0.685	0.718	1.178
ENSMUSG00000022584	2.37025	-1.67383	2.12836e-07	1.64226e-06	14.446	7.191	4.261	5.591	2.937	3.334	2.036	1.555
ENSMUSG00000032724	1.45239	-1.25558	2.16127e-07	1.66461e-06	4.392	3.839	3.388	3.591	1.814	1.096	2.355	1.037
ENSMUSG00000026039	3.08159	1.02965	2.17334e-07	1.67289e-06	3.904	4.218	5.39	8.207	10.537	10.321	13.891	9.567
ENSMUSG00000050394	1.19125	-1.19694	2.24461e-07	1.72459e-06	2.928	4.218	2.413	2.975	1.252	1.553	1.237	1.414
ENSMUSG00000027398	0.382244	-1.56739	2.3284e-07	1.77924e-06	1.562	1.784	2.105	2.052	0.777	0.731	0.279	0.754
ENSMUSG00000027360	0.197824	-1.9931	2.48538e-07	1.89148e-06	2.684	2.055	1.386	0.872	0.432	0.457	0.559	0.283
ENSMUSG00000015452	0.476983	1.61038	2.654e-07	2.00982e-06	0.39	0.757	0.667	0.667	2.548	1.416	1.557	2.074
ENSMUSG00000050395	-0.328621	-2.09514	2.85347e-07	2.15056e-06	1.22	1.784	1.027	0.769	0.216	0.32	0.16	0.424
ENSMUSG00000026303	-0.916162	2.74683	3.05123e-07	2.29414e-06	0.049	0.162	0.051	0.154	0.734	0.411	0.718	1.037
ENSMUSG00000021699	1.12268	1.24361	3.17665e-07	2.37713e-06	1.074	1.406	0.821	1.539	3.369	2.512	2.355	3.252
ENSMUSG00000028678	4.32279	1.16261	3.25385e-07	2.43345e-06	7.076	8.165	13.963	19.594	25.868	26.487	32.052	24.836
ENSMUSG00000086291	0.323362	1.52314	3.29273e-07	2.45382e-06	0.878	0.541	0.565	0.308	1.641	1.644	1.597	1.791
ENSMUSG00000006344	1.70332	1.00705	3.31805e-07	2.47123e-06	2.343	2.487	1.745	1.693	4.405	4.521	3.313	4.43
ENSMUSG00000028078	0.304508	1.45115	3.47022e-07	2.57849e-06	0.488	0.703	0.667	0.513	1.512	1.781	1.437	1.791
ENSMUSG00000046295	1.66121	1.15287	3.6284e-07	2.68812e-06	1.366	1.622	1.489	2.975	4.405	3.608	4.55	4.006
ENSMUSG00000051969	-0.655266	-2.88831	4.08917e-07	3.01007e-06	1.708	1.298	0.565	0.462	0	0.183	0.2	0.141
ENSMUSG00000109179	-0.290166	1.80111	4.16053e-07	3.05549e-06	0.439	0.27	0.257	0.256	1.209	1.142	0.918	1.084
ENSMUSG00000044201	2.62312	1.02199	4.81836e-07	3.48593e-06	2.587	3.082	4.312	5.796	9.112	7.261	8.582	7.069
ENSMUSG00000086513	1.09533	-1.23333	5.07524e-07	3.65712e-06	3.416	3.406	2.618	2.308	0.95	1.644	1.437	0.943
ENSMUSG00000026875	1.49618	-1.28122	5.7359e-07	4.09351e-06	4.246	5.786	3.183	2.667	1.296	2.055	1.437	1.744
ENSMUSG00000022938	-0.937311	-3.1286	6.04378e-07	4.28987e-06	1.171	1.244	0.308	0.564	0.043	0.228	0	0.094
ENSMUSG00000022715	0.901196	-1.24811	6.51358e-07	4.58126e-06	2.879	2.163	2.823	2.36	0.777	0.822	1.197	1.508
ENSMUSG00000110537	0.33147	1.57573	6.6671e-07	4.68142e-06	0.537	0.649	0.513	0.564	1.684	1.279	1.437	2.404
ENSMUSG00000082088	-0.696711	-2.1438	7.02923e-07	4.90842e-06	1.122	0.973	0.77	0.718	0.086	0.274	0.12	0.33
ENSMUSG00000001930	6.10768	1.02494	7.96714e-07	5.52011e-06	29.965	34.822	62.938	53.449	81.967	68.866	87.096	130.78
ENSMUSG00000085977	-0.205171	-2.13196	7.99611e-07	5.53466e-06	1.659	1.622	1.078	0.923	0.086	0.639	0.279	0.189
ENSMUSG00000100291	0.0204356	-1.55872	8.98125e-07	6.16254e-06	1.659	1.406	1.335	1.282	0.475	0.365	0.718	0.33
ENSMUSG00000021719	-0.68123	2.28935	9.12364e-07	6.25345e-06	0.049	0.216	0.257	0.154	1.166	0.822	0.798	0.566
ENSMUSG00000061143	1.7102	1.11159	1.21332e-06	8.12243e-06	2.294	2.271	1.232	2.103	3.887	3.562	3.792	5.891
ENSMUSG00000022899	0.332236	1.57736	1.67152e-06	1.08899e-05	0.439	0.703	0.77	0.359	1.598	1.507	1.317	2.404
ENSMUSG00000085081	-0.725836	-2.22002	1.75525e-06	1.14001e-05	0.83	0.649	0.873	1.18	0.389	0.046	0.2	0.094
ENSMUSG00000086119	0.91278	1.22765	1.89318e-06	1.22456e-05	0.83	1.244	0.616	1.488	2.418	2.146	2.754	2.451
ENSMUSG00000040957	1.91933	1.04509	1.97935e-06	1.27248e-05	1.855	3.19	2.669	1.795	3.8	4.612	4.75	6.457
ENSMUSG00000071311	0.430602	-1.26228	2.01652e-06	1.29374e-05	2.05	1.73	1.694	1.795	0.907	0.502	0.758	0.848
ENSMUSG00000033207	1.70893	1.1794	2.02351e-06	1.29721e-05	1.025	1.622	2.875	2.103	3.455	3.882	5.029	4.901
ENSMUSG00000021643	0.697593	1.24393	2.03997e-06	1.30548e-05	1.025	0.541	0.924	1.026	2.116	2.466	1.716	2.121
ENSMUSG00000040963	0.550399	1.33507	2.09424e-06	1.33682e-05	0.683	0.595	0.975	0.769	1.771	1.964	1.517	2.451
ENSMUSG00000049511	0.74042	1.53765	2.1808e-06	1.38647e-05	0.83	0.433	0.77	1.077	1.987	3.425	2.275	1.414
ENSMUSG00000110218	-0.0295398	-2.02629	2.19372e-06	1.39399e-05	2.05	1.352	1.129	1.385	0.821	0.137	0.279	0.189
ENSMUSG00000027654	2.54276	1.1848	2.37896e-06	1.50715e-05	2.587	1.514	4.415	5.232	8.249	7.078	8.342	7.635
ENSMUSG00000032648	0.60033	-1.37608	2.59839e-06	1.63307e-05	2.733	2.487	1.489	1.744	1.08	0.639	0.679	0.848
ENSMUSG00000102155	-0.670396	-2.18116	2.6064e-06	1.63729e-05	1.562	0.649	0.821	0.616	0.216	0.228	0.16	0.189
ENSMUSG00000104654	-0.782956	-2.03337	2.60832e-06	1.63768e-05	0.586	1.135	0.873	0.718	0.13	0.228	0.239	0.189
ENSMUSG00000013974	0.851685	-1.34807	2.72421e-06	1.70368e-05	2.733	2.974	2.31	2.103	1.339	1.416	0.559	0.66
ENSMUSG00000092277	-0.46673	-1.90074	2.89288e-06	1.80292e-05	1.366	1.19	0.616	0.975	0.345	0.365	0.239	0.141
ENSMUSG00000072618	0.0318624	1.51669	2.94829e-06	1.83293e-05	0.39	0.27	0.513	0.667	1.209	1.279	1.597	1.225
ENSMUSG00000022747	0.522972	-1.17844	2.95463e-06	1.83597e-05	1.952	2.109	1.797	1.795	0.993	0.868	0.878	0.613
ENSMUSG00000030031	1.10677	-1.11528	3.2509e-06	2.00724e-05	3.563	2.974	2.926	2.052	1.468	1.644	1.118	1.084
ENSMUSG00000086866	0.176203	-1.93842	3.54487e-06	2.16967e-05	2.196	1.352	1.591	1.693	0.302	1.05	0.239	0.189
ENSMUSG00000004347	0.452478	1.46505	4.07301e-06	2.46546e-05	0.39	0.487	0.873	0.872	1.382	1.507	2.076	2.309
ENSMUSG00000049532	0.691917	1.32702	4.1364e-06	2.50143e-05	1.318	0.649	0.462	0.923	2.03	2.42	1.756	2.309
ENSMUSG00000046456	1.023	1.16123	4.19962e-06	2.53845e-05	0.781	1.244	1.797	0.872	2.764	2.649	2.315	2.781
ENSMUSG00000039963	0.470935	1.27861	4.2375e-06	2.5589e-05	0.683	0.595	0.616	1.026	2.116	1.553	1.796	1.649
ENSMUSG00000095649	-0.443042	-1.87721	4.60058e-06	2.76889e-05	1.025	1.514	1.078	0.616	0.216	0.228	0.439	0.236
ENSMUSG00000106028	-0.353204	1.95674	4.6112e-06	2.77264e-05	0.439	0.162	0.154	0.308	1.036	1.598	0.718	0.895
ENSMUSG00000038204	1.63365	1.12423	5.38583e-06	3.19135e-05	1.708	1.46	2.926	1.334	3.887	3.562	3.393	5.42
ENSMUSG00000043993	0.729011	1.42379	6.23057e-06	3.6559e-05	0.732	0.378	0.77	1.385	2.764	1.964	2.475	1.602
ENSMUSG00000090246	0.417882	-1.21433	6.5038e-06	3.80387e-05	1.659	1.838	1.591	2.052	1.036	0.639	0.718	0.66
ENSMUSG00000078350	-0.0269496	1.70764	6.87212e-06	3.98791e-05	0.342	0.324	0.719	0.205	1.468	1.69	1.237	0.848
ENSMUSG00000099632	0.549826	1.13623	7.05811e-06	4.08833e-05	0.732	0.865	1.027	0.718	1.987	1.827	1.716	1.838
ENSMUSG00000033470	1.47779	-1.06728	7.50773e-06	4.33573e-05	3.709	4.758	3.08	3.334	1.468	2.009	2.435	1.131
ENSMUSG00000099241	-0.939224	-2.65273	8.24795e-06	4.71914e-05	0.976	0.703	1.181	0.256	0.043	0.183	0.239	0
ENSMUSG00000004814	-0.278083	1.82059	8.25885e-06	4.72324e-05	0.146	0.378	0.308	0.41	1.252	0.959	0.679	1.555
ENSMUSG00000005824	0.227106	-1.40439	1.09448e-05	6.11004e-05	1.952	1.676	1.232	1.59	0.561	0.959	0.359	0.566
ENSMUSG00000040936	0.522624	1.31676	1.09376e-05	6.11004e-05	0.83	0.541	0.667	0.923	1.987	1.233	2.395	1.791
ENSMUSG00000079505	0.656537	-1.47032	1.1507e-05	6.38988e-05	2.587	2.866	1.848	1.693	0.734	1.324	0.878	0.283
ENSMUSG00000053964	0.537806	1.38622	1.20601e-05	6.6417e-05	0.781	0.433	0.616	1.077	2.505	1.69	1.317	2.168
ENSMUSG00000017002	-0.0569454	-1.57536	1.21794e-05	6.70159e-05	1.757	1.676	0.821	1.128	0.605	0.457	0.439	0.283
ENSMUSG00000026579	0.504912	1.36047	1.43613e-05	7.77021e-05	0.927	0.541	0.821	0.564	2.505	1.69	1.996	1.178
ENSMUSG00000022432	-1.04096	-2.82849	1.53599e-05	8.27509e-05	1.22	1.135	0.154	0.41	0.086	0.091	0.16	0.047
ENSMUSG00000109008	-0.574383	1.80629	1.55684e-05	8.37317e-05	0.098	0.27	0.308	0.308	0.734	1.187	0.718	0.848
ENSMUSG00000002500	0.212497	1.36299	1.59109e-05	8.54282e-05	0.537	0.433	0.719	0.616	1.9	1.187	1.197	1.697
ENSMUSG00000052783	0.980206	1.00754	1.64041e-05	8.77038e-05	0.927	1.298	1.181	1.488	2.159	2.831	2.714	2.121
ENSMUSG00000020160	1.45543	1.00723	1.85331e-05	9.80084e-05	1.61	1.19	2.31	1.795	2.634	4.338	3.074	3.912
ENSMUSG00000014164	-0.0719681	1.58452	2.23219e-05	0.000115911	0.537	0.216	0.205	0.667	1.166	1.142	1.637	0.99
ENSMUSG00000052631	-0.553401	-1.55844	2.28361e-05	0.000118241	0.927	1.027	0.924	0.769	0.345	0.274	0.399	0.189
ENSMUSG00000041930	0.290094	1.51832	2.38406e-05	0.000122938	0.634	0.595	0.359	0.667	1.339	0.959	1.676	2.545
ENSMUSG00000040554	0.499718	1.22114	2.42714e-05	0.000124854	1.074	0.541	0.616	0.821	1.987	1.69	2.116	1.367
ENSMUSG00000096960	0.798258	-1.08061	2.59667e-05	0.000132603	2.391	2.433	2.361	1.949	1.166	1.142	1.397	0.566
ENSMUSG00000097113	0.643428	-1.1803	2.71009e-05	0.000137949	2.099	1.838	1.797	2.616	0.518	0.822	1.197	1.131
ENSMUSG00000097572	0.710454	-1.30965	3.03477e-05	0.000152875	2.099	2.812	1.489	2.667	0.605	1.507	0.918	0.613
ENSMUSG00000038522	-0.939511	-2.23756	3.05186e-05	0.000153614	0.781	0.541	0.462	1.18	0	0.091	0.279	0.236
ENSMUSG00000073236	0.850787	1.16692	3.10117e-05	0.000155786	0.634	0.865	1.745	0.872	2.591	2.055	2.076	2.545
ENSMUSG00000020191	0.225654	1.37621	3.26419e-05	0.000162875	0.781	0.757	0.462	0.308	1.555	1.872	1.557	1.037
ENSMUSG00000084845	0.671917	1.14572	3.29878e-05	0.000164211	0.976	0.865	0.77	1.026	2.721	1.872	1.477	2.026
ENSMUSG00000027932	-0.453322	1.6377	3.32503e-05	0.000165323	0.195	0.487	0.103	0.41	0.95	1.05	0.798	0.943
ENSMUSG00000067586	-0.763319	2.07423	3.72707e-05	0.000183294	0.293	0.108	0.103	0.205	0.864	1.233	0.439	0.566
ENSMUSG00000019467	0.78782	1.15732	3.89402e-05	0.000190836	1.513	1.027	0.565	0.821	2.246	2.74	1.996	1.838
ENSMUSG00000032656	0.728926	1.18348	4.32533e-05	0.000210342	1.415	0.703	1.078	0.513	2.202	2.009	1.716	2.592
ENSMUSG00000086124	-0.44287	-1.64976	4.37599e-05	0.00021256	1.269	1.406	0.719	0.667	0.345	0.32	0.2	0.424
ENSMUSG00000022479	0.817608	1.08984	4.38659e-05	0.000212993	0.976	1.352	0.77	1.077	2.764	2.557	1.916	1.649
ENSMUSG00000021411	0.0967511	1.36688	4.44182e-05	0.000215261	0.83	0.595	0.411	0.256	1.425	1.096	1.597	1.32
ENSMUSG00000097284	0.172399	1.38931	4.52737e-05	0.000218752	0.878	0.216	0.513	0.564	1.468	1.233	1.836	1.225
ENSMUSG00000052302	-0.188814	1.47974	4.66995e-05	0.000225002	0.244	0.378	0.308	0.667	0.993	1.005	1.038	1.461
ENSMUSG00000022504	0.774026	-1.24902	4.71384e-05	0.000226947	2.001	3.244	2.721	1.436	0.734	1.096	0.718	1.414
ENSMUSG00000021176	1.94811	1.01759	4.76519e-05	0.000229001	2.001	1.352	2.515	3.898	3.671	4.932	5.748	5.467
ENSMUSG00000045502	0.0786604	-1.6968	5.09362e-05	0.000243396	2.343	1.784	0.924	1.026	0.259	0.548	0.798	0.236
ENSMUSG00000063522	-1.27079	-2.47152	5.2078e-05	0.000248664	1.074	0.487	0.513	0.205	0.173	0.091	0.08	0.047
ENSMUSG00000038007	0.641293	1.01334	5.35886e-05	0.000255298	0.878	1.081	0.924	0.923	1.727	2.009	1.676	2.309
ENSMUSG00000040841	0.103197	1.55697	6.57702e-05	0.000307188	0.439	0.541	0.154	0.769	1.943	0.913	1.676	1.084
ENSMUSG00000110630	0.61864	1.0639	6.91545e-05	0.000320515	0.683	0.757	1.232	0.975	1.943	2.283	1.597	1.838
ENSMUSG00000032352	0.177028	1.26782	6.91902e-05	0.000320563	0.586	0.811	0.411	0.564	1.08	1.781	1.237	1.649
ENSMUSG00000097793	-0.0866451	1.24564	7.19939e-05	0.000332577	0.634	0.324	0.513	0.462	1.209	1.187	1.078	1.178
ENSMUSG00000073144	0.907056	-1.01559	7.31949e-05	0.000337631	3.27	2.433	2.259	1.744	1.123	1.005	1.517	1.131
ENSMUSG00000097501	0.472482	1.05043	7.44548e-05	0.000342942	0.683	0.649	0.873	1.077	1.9	1.553	1.716	1.649
ENSMUSG00000029417	0.664932	-1.89217	7.64356e-05	0.000350915	3.855	2.974	1.951	0.975	0.259	1.507	0.479	0.377
ENSMUSG00000053749	1.07009	1.01414	7.736e-05	0.000354773	1.708	0.973	1.335	1.18	2.462	2.512	1.996	3.629
ENSMUSG00000039405	1.82055	1.20398	7.7882e-05	0.000356907	3.66	2.271	1.027	1.18	4.448	6.302	4.071	4.006
ENSMUSG00000069814	0.473881	1.05398	8.70687e-05	0.000394289	0.586	0.757	0.873	1.077	1.771	1.872	1.477	1.744
ENSMUSG00000029491	0.631285	-1.05788	9.28154e-05	0.000417917	2.587	2.055	1.951	1.436	1.036	0.685	1.038	1.084
ENSMUSG00000000938	-0.374827	1.68795	9.60152e-05	0.000430637	0.488	0.216	0.205	0.308	0.95	1.644	0.758	0.66
ENSMUSG00000044701	0.295185	-1.54675	9.93573e-05	0.000444208	1.171	2.974	1.078	1.847	0.518	0.868	0.279	0.754
ENSMUSG00000098934	-1.31081	-2.61122	9.97573e-05	0.000445559	0.39	1.027	0.719	0.154	0.173	0.046	0	0.141
ENSMUSG00000035773	0.614161	1.12349	0.000104469	0.000463455	0.927	0.757	1.027	0.821	1.684	1.781	1.477	2.828
ENSMUSG00000015354	-0.142602	1.31496	0.000105044	0.000465518	0.537	0.433	0.308	0.513	0.864	1.05	1.397	1.178
ENSMUSG00000097754	-0.697513	-1.80296	0.000106185	0.000469912	0.83	1.514	0.513	0.564	0.216	0.183	0.319	0.236
ENSMUSG00000033182	-0.891438	-1.76351	0.000119037	0.000520593	0.488	0.541	1.027	0.821	0.302	0.228	0.2	0.094
ENSMUSG00000027570	0.172583	-1.19151	0.000120282	0.000525492	1.464	1.838	1.283	1.334	0.95	0.594	0.639	0.377
ENSMUSG00000049092	-0.351761	1.57877	0.000122241	0.000533129	0.39	0.216	0.411	0.308	0.777	1.598	0.679	0.99
ENSMUSG00000085152	-0.875337	-1.99111	0.000122406	0.000533664	1.171	1.081	0.462	0.308	0.13	0.183	0.239	0.189
ENSMUSG00000026073	-0.409196	-1.57652	0.00012671	0.000550717	1.366	1.244	0.873	0.616	0.561	0.183	0.239	0.377
ENSMUSG00000061723	-0.51597	-1.41023	0.000138175	0.000595428	0.732	0.865	1.181	0.872	0.216	0.411	0.399	0.33
ENSMUSG00000021745	1.34907	1.01636	0.000141191	0.000606772	2.147	1.676	1.643	0.872	2.462	4.064	3.872	2.451
ENSMUSG00000014773	-0.279851	-1.39175	0.000149118	0.000638232	1.074	1.352	1.027	0.923	0.259	0.32	0.718	0.33
ENSMUSG00000086890	-0.406357	1.489	0.000151193	0.000645582	0.195	0.433	0.359	0.359	0.907	0.868	0.679	1.367
ENSMUSG00000079018	-0.502901	-1.97802	0.000155478	0.000661422	1.855	0.919	0.462	0.821	0.086	0.548	0.2	0.189
ENSMUSG00000055632	-0.454679	-1.58173	0.000161451	0.000684757	0.537	1.352	1.386	0.718	0.216	0.32	0.399	0.377
ENSMUSG00000109587	-0.666096	1.57549	0.000190873	0.00079554	0.195	0.27	0.308	0.256	0.605	0.548	0.918	1.037
ENSMUSG00000003378	0.219276	1.24708	0.000244055	0.000992526	0.537	0.27	0.975	0.667	1.943	1.142	1.317	1.461
ENSMUSG00000020042	0.075239	1.11503	0.00025163	0.00102098	0.83	0.541	0.359	0.616	1.252	1.233	1.237	1.414
ENSMUSG00000030124	-0.321322	-1.47313	0.000254564	0.00103057	1.513	1.19	0.873	0.718	0.691	0.32	0.239	0.283
ENSMUSG00000022099	0.108406	1.12521	0.000267434	0.00107475	0.634	0.541	0.565	0.667	1.425	1.553	0.918	1.414
ENSMUSG00000063623	-0.342332	1.24669	0.000278465	0.00111272	0.488	0.324	0.411	0.359	0.821	0.959	1.118	0.895
ENSMUSG00000073733	-0.36422	-1.41287	0.000283325	0.00112964	0.732	1.244	1.129	1.026	0.259	0.685	0.399	0.189
ENSMUSG00000038777	-0.0502927	1.19563	0.00030293	0.00119648	0.342	0.541	0.565	0.616	1.252	0.868	1.118	1.508
ENSMUSG00000054555	1.1738	1.04208	0.0003085	0.00121544	1.708	0.973	1.181	1.641	2.03	4.11	3.353	1.885
ENSMUSG00000029084	0.370934	-1.16495	0.000320743	0.00125546	2.538	1.784	1.54	0.923	0.821	0.776	0.758	0.66
ENSMUSG00000027257	-0.0687866	1.28252	0.000345162	0.00134066	0.878	0.216	0.462	0.359	1.252	1.187	0.998	1.32
ENSMUSG00000091575	0.807515	1.19166	0.000345096	0.00134066	0.976	0.324	1.283	1.334	2.721	1.461	1.916	2.922
ENSMUSG00000042265	0.174665	-1.25373	0.00035262	0.00136627	1.366	1.947	1.643	1.077	0.907	0.365	0.359	0.895
ENSMUSG00000036185	-0.443478	1.56332	0.000356537	0.00137849	0.098	0.27	0.411	0.462	1.382	0.594	0.998	0.707
ENSMUSG00000037709	0.613376	1.05745	0.000356335	0.00137849	0.83	0.919	0.77	1.128	1.814	1.279	1.756	2.781
ENSMUSG00000110030	0.00173011	1.08705	0.000366861	0.00141451	0.488	0.595	0.719	0.462	1.036	1.187	1.197	1.414
ENSMUSG00000064336	0.213391	-1.40847	0.000368018	0.0014181	0.537	2.325	2.156	1.436	0.691	0.639	0.559	0.518
ENSMUSG00000042096	-1.19082	-1.97156	0.000375536	0.00144575	1.025	0.649	0.257	0.359	0.173	0.091	0.16	0.141
ENSMUSG00000079110	-0.373857	1.38474	0.000448667	0.00169174	0.146	0.703	0.308	0.308	0.993	1.142	0.878	0.801
ENSMUSG00000009145	0.454996	1.26718	0.000519061	0.00193351	0.634	0.433	0.462	1.385	2.246	1.416	1.197	2.215
ENSMUSG00000038486	0.0352648	1.23433	0.000519898	0.00193606	0.39	0.487	0.975	0.308	1.166	1.142	1.118	1.697
ENSMUSG00000049848	-0.873911	-1.96957	0.000525042	0.00195341	0.976	1.244	0.411	0.41	0.086	0.137	0.08	0.471
ENSMUSG00000074420	-0.41977	-1.42652	0.000537395	0.00199066	0.83	1.135	0.565	1.436	0.389	0.457	0.16	0.471
ENSMUSG00000020601	-0.665929	1.48551	0.000550431	0.00203062	0.293	0.378	0.257	0.154	0.734	1.096	0.758	0.471
ENSMUSG00000084964	-0.0862595	1.14275	0.000609928	0.00221774	0.39	0.27	0.821	0.564	1.166	1.096	1.118	1.178
ENSMUSG00000035390	-0.626439	1.56101	0.000630034	0.00228297	0.537	0.108	0.308	0.103	0.777	0.548	0.798	1.084
ENSMUSG00000039607	0.198694	1.05131	0.000685401	0.00246522	0.683	0.865	0.462	0.667	1.339	1.827	1.357	1.037
ENSMUSG00000029869	0.612502	1.05704	0.000695567	0.00249681	0.781	0.595	0.565	1.693	1.943	1.964	1.716	1.979
ENSMUSG00000045231	-0.168406	1.11831	0.000705088	0.00252311	0.488	0.595	0.565	0.308	0.95	1.233	0.918	1.178
ENSMUSG00000028943	0.406028	1.07741	0.000763542	0.00271003	0.244	0.919	0.975	0.975	1.555	1.781	1.397	1.838
ENSMUSG00000053626	-0.180838	1.31651	0.000809491	0.00285866	0.634	0.27	0.308	0.513	0.734	1.507	1.357	0.754
ENSMUSG00000045326	-0.321631	-1.35415	0.000814747	0.00287562	1.61	1.135	0.873	0.564	0.216	0.411	0.439	0.566
ENSMUSG00000031538	0.633792	1.00051	0.000852027	0.00299882	1.122	0.973	0.975	0.718	1.641	2.786	1.956	1.225
ENSMUSG00000032528	-0.277322	1.35819	0.000891353	0.00311986	0.342	0.27	0.667	0.308	1.296	0.822	0.599	1.414
ENSMUSG00000056004	0.465548	1.0323	0.000895775	0.00313274	0.488	0.703	0.719	1.385	1.512	1.598	2.116	1.508
ENSMUSG00000020434	-0.0776679	-1.22154	0.000911807	0.00317737	1.562	0.757	0.873	1.693	0.432	0.457	0.758	0.424
ENSMUSG00000042826	-0.441759	1.2951	0.000947468	0.00328365	0.586	0.378	0.359	0.103	1.08	0.868	0.758	0.848
ENSMUSG00000106743	0.410319	1.07698	0.00100021	0.0034427	0.244	0.811	1.181	0.872	1.598	1.781	1.796	1.367
ENSMUSG00000042810	-0.130891	1.02132	0.00103306	0.00354226	0.439	0.595	0.462	0.616	1.166	1.05	0.958	1.131
ENSMUSG00000110344	0.402838	1.00422	0.00104898	0.00359004	0.634	0.541	0.719	1.282	1.814	1.37	1.876	1.32
ENSMUSG00000027834	-0.630274	-1.34751	0.00107985	0.00368571	0.732	0.865	0.565	1.128	0.345	0.502	0.16	0.283
ENSMUSG00000092035	0.10618	1.25833	0.00111888	0.00380454	0.976	0.378	0.205	0.667	1.123	1.964	1.277	1.037
ENSMUSG00000054976	-0.443207	-1.72386	0.00116124	0.00393589	0.976	1.081	0.205	1.847	0.13	0.457	0.359	0.283
ENSMUSG00000056145	0.338102	1.08217	0.00118716	0.00401406	0.976	0.757	0.821	0.359	1.857	1.964	1.437	0.943
ENSMUSG00000046272	-0.619234	-1.4601	0.00119572	0.00403863	1.122	0.649	0.821	0.769	0.475	0.046	0.479	0.189
ENSMUSG00000059336	-0.33163	1.26235	0.00142096	0.00468795	0.39	0.27	0.257	0.667	0.993	0.548	1.118	1.178
ENSMUSG00000105283	0.323897	-1.04477	0.00151915	0.00497909	2.294	1.406	1.078	1.59	0.475	1.142	0.679	0.801
ENSMUSG00000085126	-0.300419	-1.07782	0.00171528	0.0055347	0.83	1.135	0.975	1.077	0.605	0.639	0.319	0.33
ENSMUSG00000075389	0.0424119	1.01127	0.00180199	0.00577175	0.439	0.541	0.975	0.462	1.08	1.142	1.477	1.178
ENSMUSG00000037846	0.0741229	1.02073	0.0019058	0.00606735	0.586	0.324	0.565	0.975	1.166	1.187	1.557	1.084
ENSMUSG00000053178	-0.217545	1.03857	0.00193468	0.00614982	0.342	0.324	0.565	0.718	1.036	0.959	0.998	1.037
ENSMUSG00000046714	-0.362911	1.35014	0.00196948	0.00623709	0.537	0.487	0.205	0.256	0.605	1.644	0.878	0.707
ENSMUSG00000051029	-0.289753	-1.15069	0.00201183	0.00636323	0.683	1.081	1.283	1.077	0.259	0.32	0.559	0.707
ENSMUSG00000021765	-0.575099	1.38356	0.00213187	0.00670265	0.586	0.27	0.154	0.205	0.734	1.187	0.838	0.471
ENSMUSG00000047181	0.176641	1.10655	0.00214483	0.00673838	0.83	0.595	0.308	0.821	1.425	2.101	1.078	0.943
ENSMUSG00000014776	-0.188536	1.03055	0.00216497	0.00679657	0.39	0.378	0.616	0.616	1.296	1.005	0.958	0.848
ENSMUSG00000035878	-0.37457	1.07234	0.00226695	0.00707283	0.488	0.27	0.565	0.359	0.821	0.822	1.078	0.848
ENSMUSG00000097868	-0.422598	-1.08507	0.00228028	0.0071074	1.025	0.973	1.027	0.616	0.518	0.274	0.479	0.424
ENSMUSG00000109118	-0.217633	1.03976	0.00232286	0.00722585	0.39	0.27	0.616	0.667	1.166	1.05	0.918	0.895
ENSMUSG00000049719	-0.861778	-1.43388	0.00232516	0.00722945	1.122	0.378	0.462	0.769	0.173	0.274	0.359	0.189
ENSMUSG00000021913	-0.124304	1.07107	0.00249466	0.00767525	0.586	0.649	0.359	0.462	1.209	0.731	1.477	0.895
ENSMUSG00000041012	-0.384862	1.18307	0.00252455	0.00775967	0.293	0.216	0.462	0.616	1.166	1.096	0.718	0.66
ENSMUSG00000048644	-0.207837	1.00249	0.00254487	0.00781452	0.683	0.541	0.411	0.359	0.993	1.187	0.998	0.848
ENSMUSG00000087502	-0.277769	1.05201	0.00263737	0.00806737	0.39	0.433	0.667	0.359	1.252	0.959	0.798	0.848
ENSMUSG00000108624	-0.611668	1.24662	0.00275179	0.00837062	0.244	0.324	0.359	0.359	0.777	1.187	0.559	0.566
ENSMUSG00000024395	-0.666851	1.30495	0.00277587	0.00842763	0.244	0.27	0.257	0.41	0.475	0.594	1.158	0.707
ENSMUSG00000057265	-0.387951	-1.08087	0.00301677	0.00905891	0.976	0.811	0.616	1.334	0.432	0.548	0.359	0.424
ENSMUSG00000045327	-0.378498	-1.06143	0.00307451	0.00920387	1.025	0.865	0.975	0.872	0.432	0.32	0.718	0.283
ENSMUSG00000063632	-0.362377	1.08916	0.00343283	0.0101231	0.39	0.649	0.257	0.41	0.734	1.233	0.918	0.754
ENSMUSG00000020193	-0.168662	1.06114	0.00345055	0.0101706	0.293	0.541	0.667	0.513	0.648	1.005	1.197	1.367
ENSMUSG00000022758	-0.329115	1.20562	0.00356737	0.010454	0.293	0.703	0.411	0.256	1.296	1.187	0.519	0.848
ENSMUSG00000107402	-0.430404	1.04008	0.0037374	0.0108866	0.39	0.433	0.513	0.308	0.734	0.868	1.078	0.707
ENSMUSG00000029648	-0.377921	-1.31063	0.00385923	0.0111976	0.683	1.027	1.027	1.231	0.475	0.137	0.798	0.141
ENSMUSG00000036585	0.019095	1.03096	0.00395364	0.0114087	0.537	0.378	0.873	0.564	1.08	1.872	0.958	0.943
ENSMUSG00000110234	-0.593301	-1.08485	0.00431812	0.0123365	0.83	0.541	1.078	0.718	0.432	0.32	0.439	0.283
ENSMUSG00000032184	-0.170447	-1.2191	0.00432413	0.0123453	1.513	1.622	0.616	0.821	0.216	0.502	0.838	0.377
ENSMUSG00000050350	-0.876134	-1.417	0.00531239	0.0147568	0.878	1.081	0.359	0.41	0.302	0.046	0.279	0.377
ENSMUSG00000110594	-0.282045	-1.13789	0.00569403	0.015662	1.074	0.919	0.975	1.128	0.302	0.457	0.918	0.141
ENSMUSG00000090894	-0.554831	-1.16527	0.00606425	0.0164937	1.025	1.19	0.411	0.718	0.432	0.32	0.519	0.189
ENSMUSG00000051177	-0.585952	1.21141	0.00704602	0.0187365	0.342	0.433	0.411	0.154	0.389	1.279	0.758	0.707
ENSMUSG00000027692	0.385684	1.12169	0.00721121	0.019123	1.122	1.244	0.154	0.462	1.684	2.329	1.277	1.225
ENSMUSG00000052560	-0.419095	1.26	0.00741185	0.0195708	0.439	0.27	0.616	0.154	1.555	0.959	0.599	0.471
ENSMUSG00000028989	-0.691943	1.11296	0.00795309	0.0208243	0.244	0.324	0.308	0.41	1.08	0.594	0.519	0.613
ENSMUSG00000054822	-0.876284	-1.34135	0.00828449	0.0215537	0.342	0.811	1.232	0.308	0.216	0.274	0.359	0.189
ENSMUSG00000025650	0.42102	-1.02066	0.00865257	0.022332	2.733	2.001	0.873	1.18	1.296	0.594	0.958	0.471
ENSMUSG00000087263	-0.288356	-1.08749	0.00923197	0.0235866	0.488	1.244	1.129	1.231	0.389	0.365	0.279	0.895
ENSMUSG00000086851	-0.679528	1.29485	0.0105459	0.0263784	0.439	0.324	0.205	0.205	0.777	1.233	0.718	0.189
ENSMUSG00000063018	-0.488469	1.08185	0.0121482	0.0297792	0.39	0.216	0.616	0.308	0.605	1.279	0.918	0.471
ENSMUSG00000044927	-0.299332	1.06979	0.0128533	0.031235	0.293	0.27	0.719	0.513	1.641	0.822	0.758	0.566
ENSMUSG00000032739	-0.240279	-1.04479	0.0130215	0.0315709	1.415	1.244	0.821	0.667	0.216	0.274	0.838	0.66
ENSMUSG00000025656	-0.199717	1.07968	0.0150974	0.0358476	0.927	0.108	0.308	0.564	0.734	0.731	1.357	1.272
ENSMUSG00000098286	-1.18915	-1.59116	0.0151426	0.0359211	0.39	1.352	0.205	0.256	0.043	0.228	0.12	0.33
ENSMUSG00000045968	-0.638701	1.12521	0.0152809	0.0361949	0.39	0.216	0.359	0.359	1.382	0.594	0.479	0.471
ENSMUSG00000001095	-0.677073	1.06748	0.0174312	0.0404987	0.342	0.487	0.205	0.308	0.432	0.548	0.639	1.225
ENSMUSG00000079645	-1.07877	-1.31193	0.0179393	0.0414886	1.074	0.324	0.308	0.513	0.345	0.274	0.04	0.236
ENSMUSG00000040314	-0.975431	-1.15029	0.0220027	0.0491329	1.074	0.595	0.411	0.256	0.302	0.137	0.359	0.236
